# Supplementary material for: Epigenetic profiles of response to transcranial magnetic stimulation in treatment resistant depression
Source: Research Square preprint supplement (doi:10.21203/rs.3.rs-6882834/v1), 2025-07-22
Supplement: Supplementary file 1 [file 22f06731e391f74c6094d718.docx]

**Supplementary Materials**

**Epigenetic profiles of response to transcranial magnetic stimulation in treatment resistant depression.**

**Authors:** Jan Dahrendorff1, Kenneth Pages2, Glenn Currier3, Md Mainul Hasan Sarker1, Zachary Graham1, Adetola Louis-Jacques4, Getachew Dagne5, Monica Uddin1

**Affiliations:**

1. Genomics Program, College of Public Health, University of South Florida, Tampa, FL, USA
2. TMS of South Tampa, Tampa, FL, USA
3. Department of Psychiatry and Behavioral Neurosciences, University of South Florida, Tampa, FL, USA
4. Department of Obstetrics & Gynecology, College of Medicine, University of Florida, Gainesville, FL, USA
5. College of Public Health, University of South Florida Tampa, Fl.

Corresponding Author:

Monica Uddin, Ph.D.

Genomics Program, College of Public Health

University of South Florida

Tampa, FL 33612

Email: [monica43@usf.edu](mailto:monica43@usf.edu)

# Supplementary Figure 1 Bioinformatics Workflow


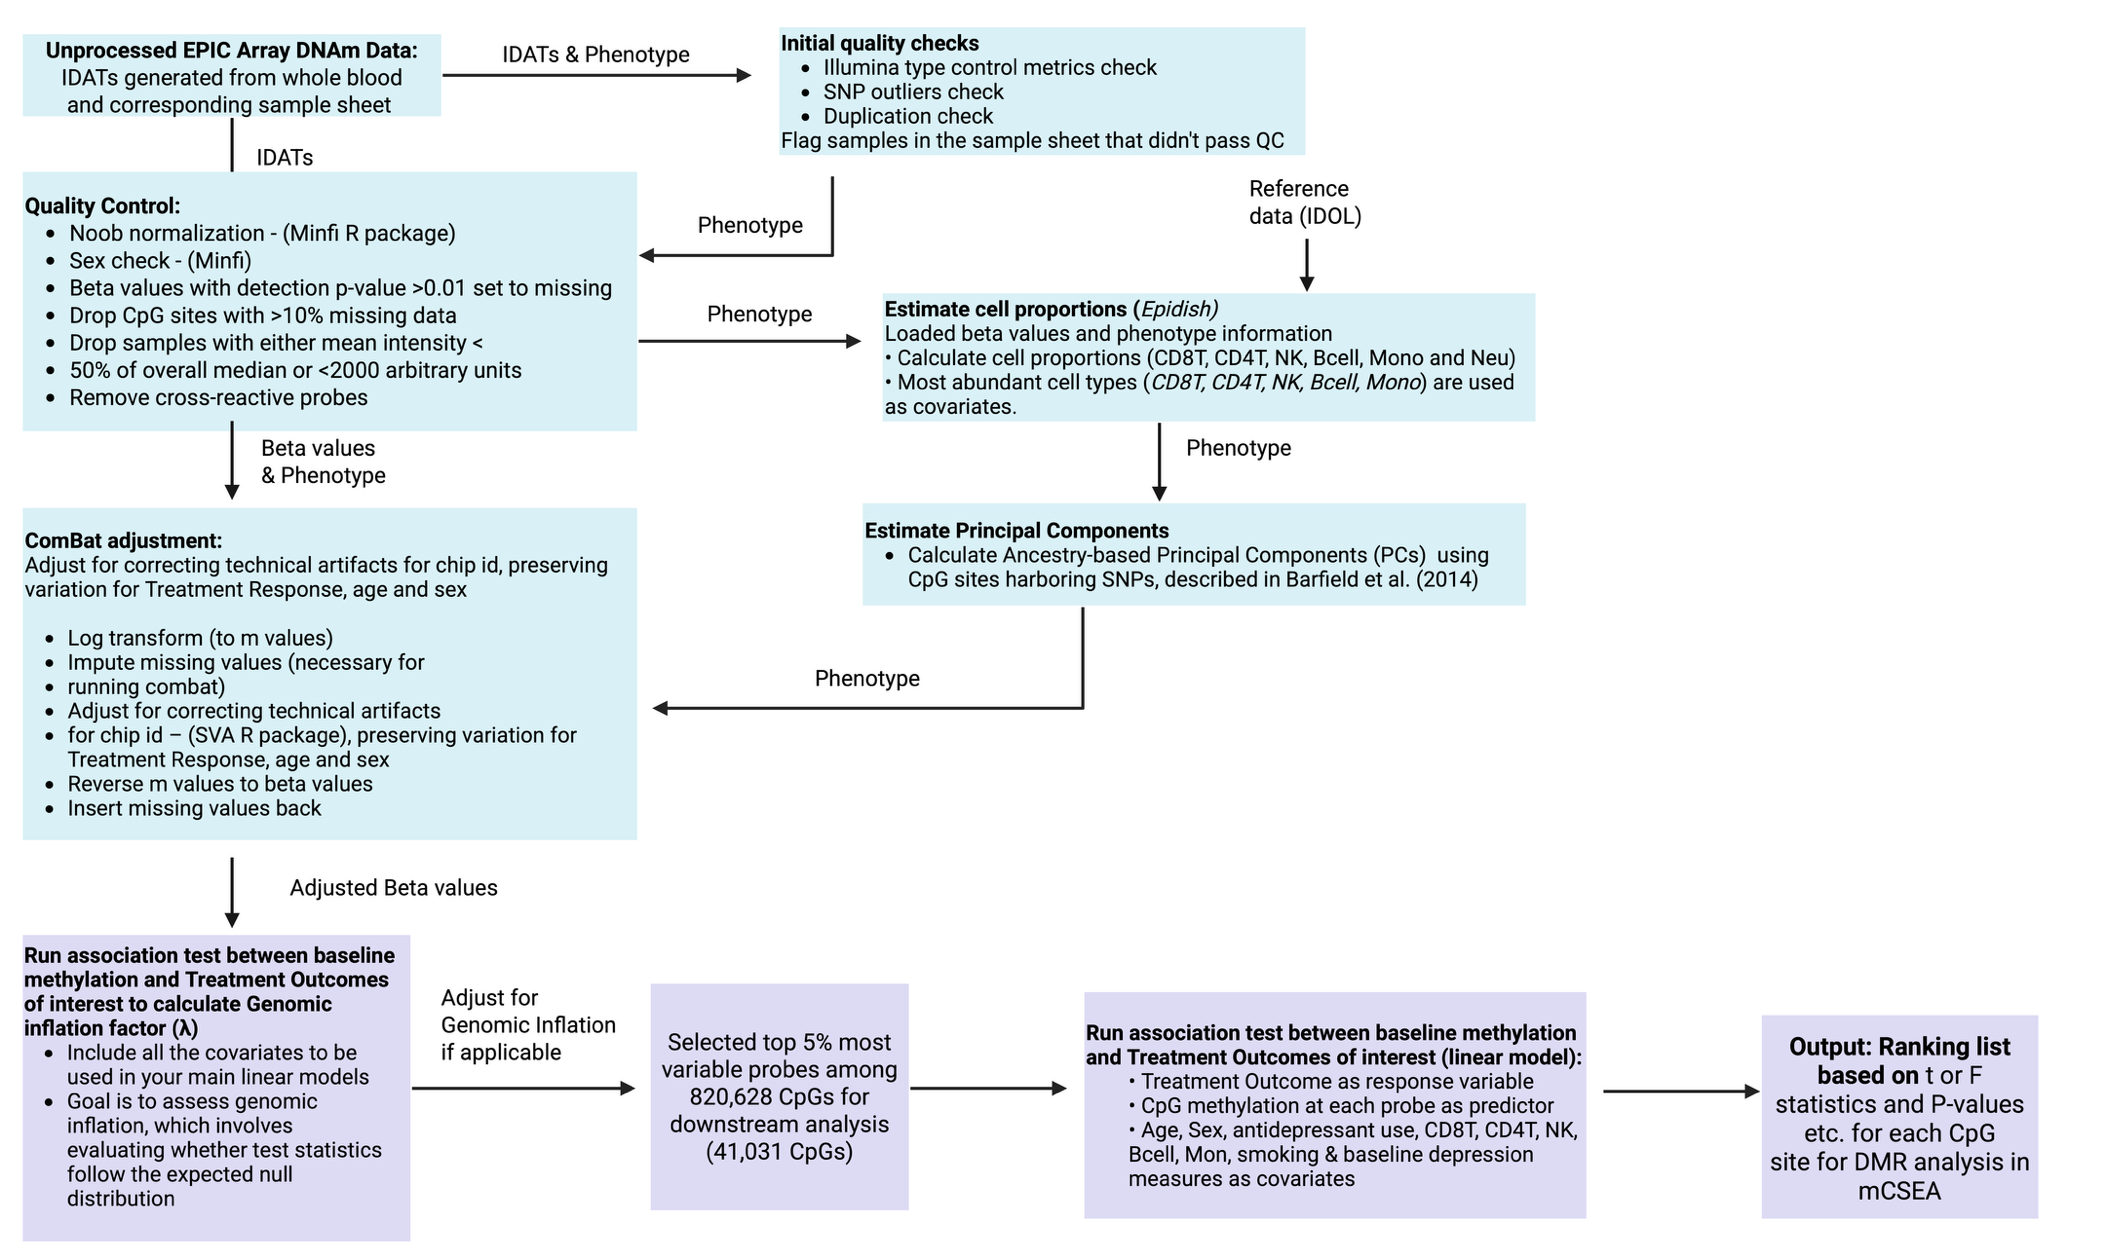


# Supplementary Figure 2


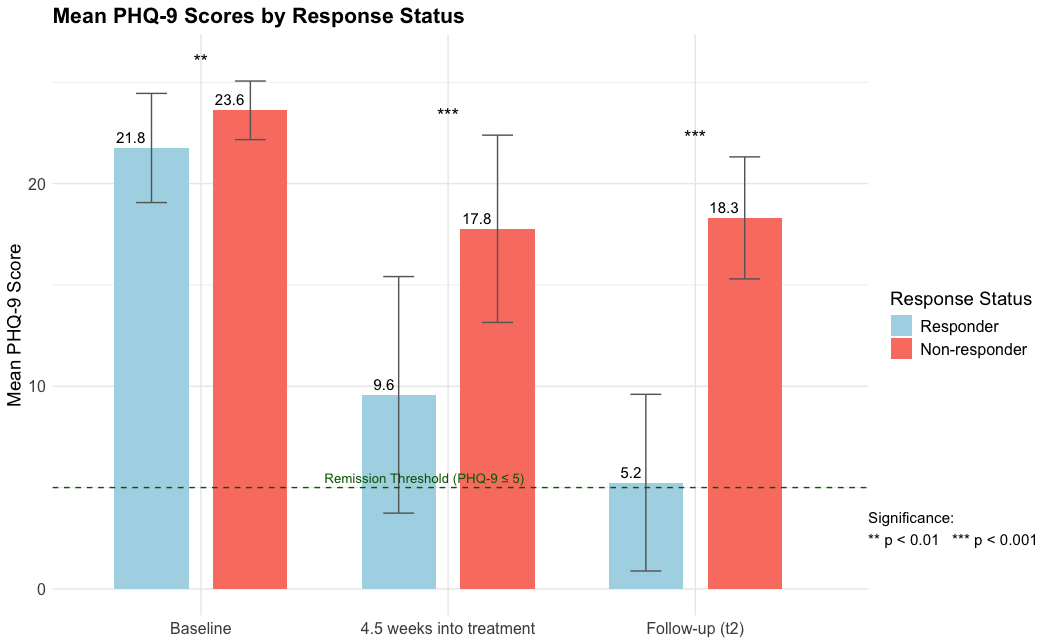


**Fig. 2 Mean PHQ-9 Scores Over Time by Treatment Response Status.** The bar plot displays the mean PHQ-9 scores at three timepoints: baseline (t0), approximately 4.5 weeks into treatment, and at follow-up (t2), stratified by treatment response status. Responders (blue bars) showed a greater reduction in PHQ-9 scores over time compared to non-responders (orange bars). Error bars represent standard errors of the mean (SE). The dashed green line marks the remission threshold (PHQ-9 ≤ 5), indicating a clinically significant reduction in depressive symptoms.

# Supplemental Figure 3 Overlapping DMR in Treatment Outcomes identified in all 3 models


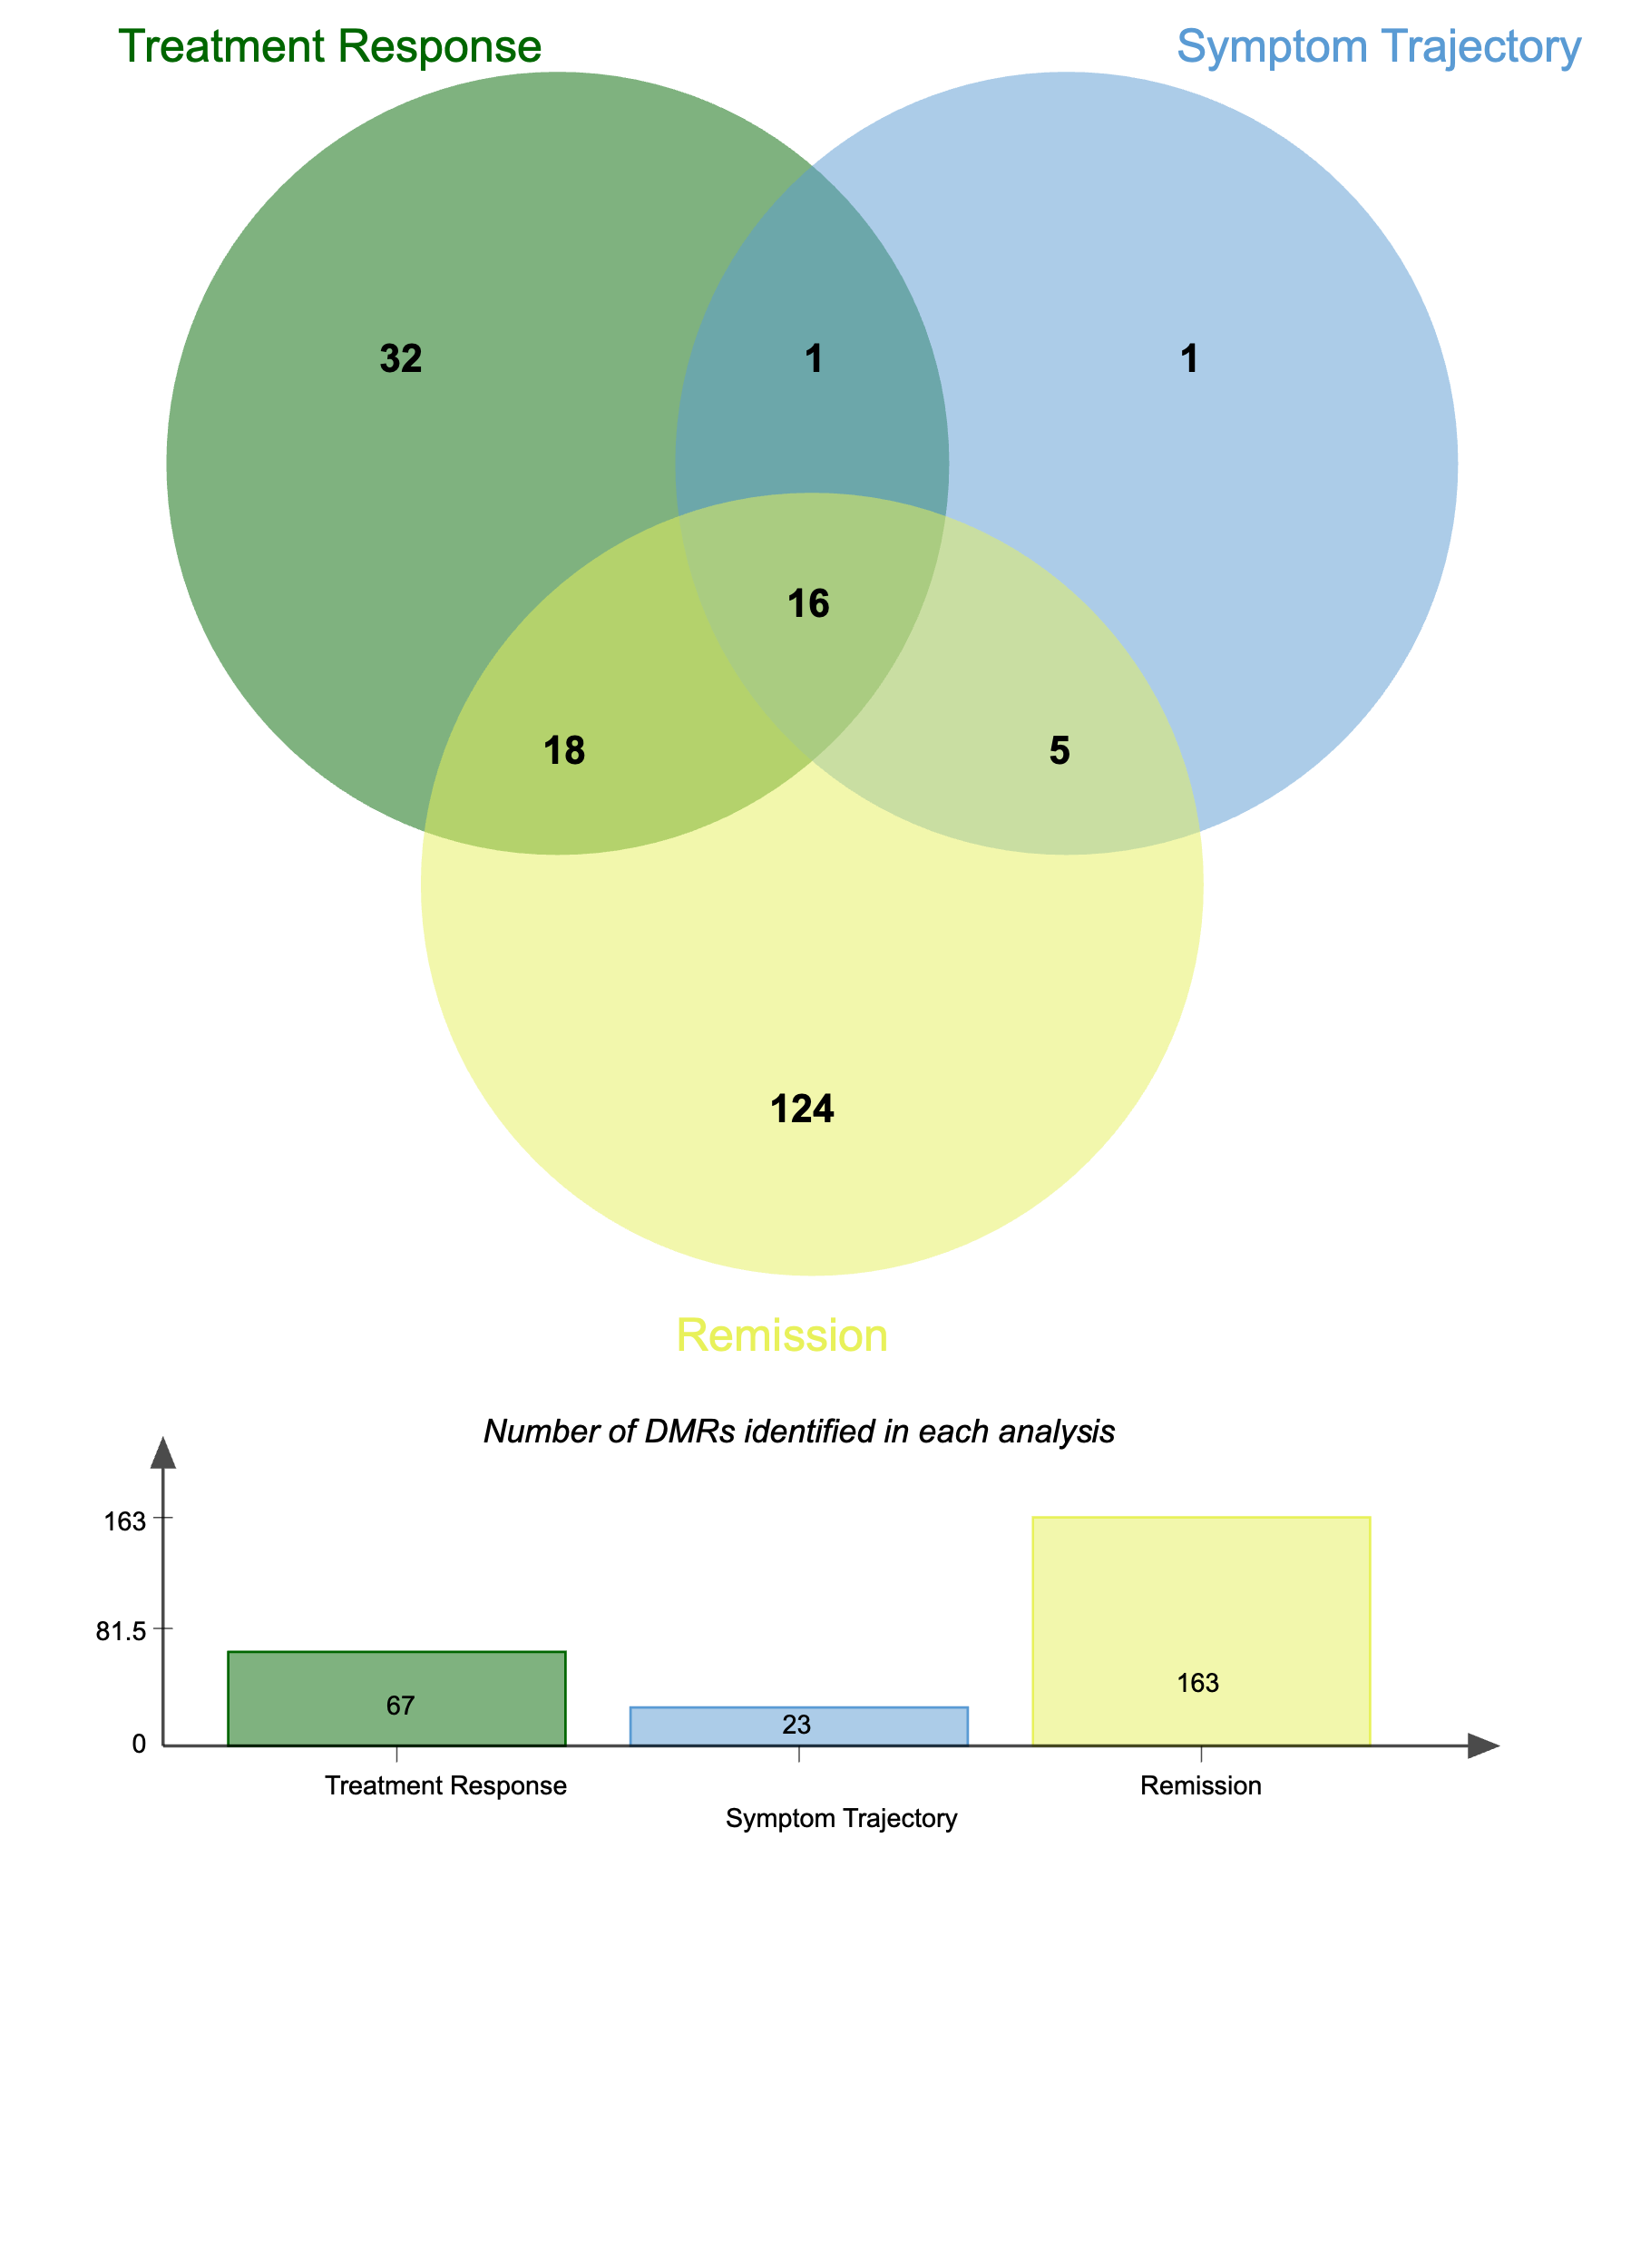


**Sup. Fig. 3. Overlapping DMRs among treatment outcomes**. Venn diagram showing the overlap in DMRs among our three treatment outcomes of interest; DMRs identified in treatment response are shown in green, DMRs identified in the symptom trajectory analysis are shown in blue while DMRs identified in the remission model are shown in yellow.

# Code Availability

The R code implemented in this manuscript is available on GitHub.
