# Supplementary material for: Epigenetic profiles of response to transcranial magnetic stimulation in treatment resistant depression
Source: Research Square preprint supplement (doi:10.21203/rs.3.rs-6882834/v1), 2025-07-22
Supplement: Supplementary file 2 [file b6bdcde227900cd6b7d36d5c.xlsx]

## Sheet: Notes
Supplementary Material Name	Description
S1	TMS Treatment and Medication Information
S2	DMRs Treatment Response
S3	DMRs Symptom Trajectory
S4	DMRs Remission
S5	Differentially methylated BDNF promoter probes Treatment Response
S6	Differentially methylated BDNF promoter probes Symptom Trajectory
S7	Differentially methylated BDNF promoter probes Remisison
S8	Probe-level estimates of methylation of probes from overlaping DMRs- concordance between peripheral blood and multiple brain regions
S9	Probe-level estimates of BDNF methylation concordance between peripheral blood and multiple brain regions
S10	Gene Ontology (GO) enrichment analysis for Biological Processes (BP) Treatment Response
S11	KEGG Pathway Enrichment Analysis Treatment Response
S12	Gene Ontology (GO) enrichment analysis for Biological Processes (BP) Symptom Trajectory
S13	KEGG Pathway Enrichment Analysis Symptom Trajectory
S14	Gene Ontology (GO) enrichment analysis for Biological Processes (BP) Remission
S15	KEGG Pathway Enrichment Analysis Treatment Remission

## Sheet: S1
TMS Treatment Information				Medication according to Anatomical Therapeutic Chemical Classification System (ATC Code)
Number of TMS Treatments	protocol_beginning	protocol_switch	protocol.80.	SSRIs (N06AB)	Other Antidepressants (N06AX)	Non-selective monoamine reuptake inhibitors (N06AA)	Anxiolytics, Benzodiazepine Derivates (N05BA)	Other antipsychychotics	Centrally acting symphathomimetics (N06BA)	Antipsychotics (N05A)	Corticosteroids for systemic use (H02)	Opioids (N02A)	Antiepileptics (N03)	Anti-inflammatory and antirheumatic products, non steroids (M01A)	Beta blocking agents (C07)	HMG-CoA reductase inhibitors (Statins) (C10AA)	Antidepressant_use
36	Right	Sequential Bilateral	Sequential Bilateral	0	1	0	0	0	0	0	0	0	0	0	0	0	1
36	Right	Sequential Bilateral	Sequential Bilateral	0	1	0	0	0	0	0	0	0	0	1	0	0	1
36	Left		Left	0	1	0	0	0	1	0	0	0	1	0	0	0	1
36	Sequential Bilateral		Sequential Bilateral	1	0	0	0	0	0	0	0	0	0	0	1	0	1
36	Sequential Bilateral		Sequential Bilateral	0	0	0	0	1	1	0	0	0	0	0	0	0	0
36	Sequential Bilateral		Sequential Bilateral	0	1	0	1	0	0	0	0	0	0	0	1	0	1
36	Sequential Bilateral		Sequential Bilateral	0	1	0	0	0	0	0	0	0	1	0	0	0	1
36	Sequential Bilateral		Sequential Bilateral	0	0	0	1	0	0	0	0	0	0	0	0	0	0
37	Sequential Bilateral		Sequential Bilateral	0	0	0	0	0	0	0	0	0	0	0	1	0	0
36	Sequential Bilateral		Sequential Bilateral	0	0	0	0	0	0	0	0	0	0	0	0	0	0
36	Right	Sequential Bilateral	Combination	0	1	0	0	0	0	0	0	0	1	0	0	0	1
36	Left		Left	0	0	0	0	0	0	0	0	0	0	0	1	0	0
36	Right		Right	0	0	0	0	0	0	0	1	1	0	1	0	0	0
36	Left	Sequential Bilateral	Combination	1	0	0	1	0	0	0	0	0	0	0	0	0	1
36	Right		Right	1	1	0	0	0	0	0	0	0	0	0	0	0	1
36	Left		Left	1	0	0	1	0	0	0	0	0	0	0	0	0	1
36	Left		Left	1	0	0	1	0	1	0	0	0	0	0	0	0	1
36	Left	Sequential Bilateral	Combination	1	0	0	1	0	0	0	0	0	0	0	0	0	1
36	Left		Left	0	1	0	0	0	1	1	0	0	0	0	0	0	1
37	Sequential Bilateral		Sequential Bilateral	0	0	0	1	0	0	0	0	0	0	0	0	0	0
36	Left		Left	0	0	0	0	0	0	0	0	0	0	0	0	0	0
36	Sequential Bilateral		Sequential Bilateral	0	0	0	0	0	0	0	0	0	1	0	0	0	0
36	Right		Right	0	0	0	1	0	0	0	0	1	1	0	0	1	0
36	Right	Sequential Bilateral	Combination	0	0	0	1	0	1	0	0	0	0	0	0	0	0
36	Left	Sequential Bilateral	Combination	0	0	0	0	0	0	0	0	0	1	0	0	0	0
37	Sequential Bilateral		Sequential Bilateral	0	1	0	1	0	0	0	0	0	0	0	0	0	1
36	Right	Left	Combination	1	0	0	0	0	0	0	0	0	0	0	0	0	1
37	Right	Left	Combination	0	1	0	0	0	0	0	0	0	1	0	0	0	1
36	Left	Sequential Bilateral	Combination	0	1	0	0	0	0	0	0	0	0	0	0	0	1
36	Left	Sequential Bilateral	Combination	0	0	0	0	0	1	0	0	0	1	0	0	0	0
37	Right	Left	Combination	1	0	0	1	0	0	0	0	0	0	0	0	0	1
36	Right	Sequential bilateral	Combination	1	1	0	0	0	0	0	0	0	1	0	0	0	1
36	Left	Sequential bilateral	Combination	0	1	0	0	0	0	0	0	0	0	0	0	0	1
37	Right		Right	1	0	0	0	0	0	0	0	0	0	0	0	0	1
36	Left		Left	0	0	0	0	0	0	0	0	0	0	0	0	0	0
36	Left		Left	1	0	0	1	0	0	0	0	0	0	0	0	0	1
36	Sequential Bilateral	Left	Combination	0	1	0	0	0	0	0	0	0	1	0	0	0	1
36	Right		Right	0	0	0	0	0	0	0	0	0	0	0	0	0	0
36	Left		Left	0	1	0	0	0	0	0	0	0	0	0	0	0	1
38	Right	Left	Combination	1	0	0	0	0	0	0	0	0	0	0	0	0	1
37	Left	Sequential bilateral	Combination	0	0	0	0	0	0	0	0	0	1	1	0	0	0
36	Right	Left	Combination	0	0	0	0	0	0	0	0	0	0	0	0	0	0
36	Right	Left	Combination	0	1	0	0	0	0	0	0	0	1	0	0	0	1
36	Left		Left	1	0	0	0	0	0	0	0	0	0	0	1	0	1
36	Left	Left	Left	0	0	0	0	0	0	0	0	0	0	0	0	0	0
40	Left		Left	1	0	0	0	0	1	0	0	0	0	0	0	0	1

## Sheet: S2
Differentially methylated region analysis - Treatment Response
	pval	padj	log2err	ES	NES	size	leadingEdge
BCOR	2.30823e-05	0.0017722	0.57561	-0.540522	-2.21234	66	cg02693068, cg13929917, cg24508310, cg20348344, cg05559023, cg05721877, cg07601068, cg12360110, cg19937286, cg08174182, cg14261068, cg03161453, cg15386612, cg24156613, cg00389552, cg03088756, cg06948553, cg26046341, cg02169289, cg02433927, cg11049634, cg08707617, cg24183173, cg22346771, cg18813691, cg02931660, cg21010298, cg01110765, cg10055320, cg13113748, cg00206414, cg11143827, cg23496314, cg1…
HOXA4	3.44198e-05	0.00198201	0.557332	-0.763035	-2.19751	15	cg04317399, cg23884241, cg14359292, cg24169822, cg22997113, cg07317062, cg25952581, cg11410718, cg03724423, cg08657492, cg17457637, cg11015251, cg19142026, cg16651126
DDX43	3.57443e-06	0.000596073	0.627257	-0.926604	-2.09706	7	cg03669949, cg16143502, cg15936068, cg12045875, cg17188169, cg08124399, cg14556503
MFSD6L	4.8737e-07	0.000336773	0.659444	-0.972285	-2.0898	6	cg18963365, cg24203800, cg18561560, cg05730038, cg18432414, cg11685316
TNNT1	5.17574e-06	0.000596073	0.610527	-0.916031	-2.07313	7	cg18649823, cg19504245, cg24699670, cg10218876, cg22711187, cg07189381
HKR1	4.79179e-05	0.00236509	0.557332	-0.834384	-2.05863	9	cg23756236, cg24834889, cg12024906, cg08565796, cg10237978, cg12948621, cg26734888, cg05280698
CPT1B	5.66355e-05	0.00254249	0.557332	-0.850889	-2.01133	8	cg17137457, cg08260245, cg01081346, cg05156901, cg27502912, cg00270625, cg10770023, cg19112186
TMEM72	2.78687e-06	0.000596073	0.627257	-0.987081	-1.98891	5	cg26700422, cg04218760, cg06994016, cg13319266, cg05187965
ATP6V1C1	3.19656e-06	0.000596073	0.627257	-0.977843	-1.9703	5	cg08793540, cg14877637, cg21442626, cg22150661, cg14341424
AURKC	0.000120985	0.00432335	0.538434	-0.852135	-1.92853	7	cg25432232, cg06643849, cg25802888, cg19603903, cg23371413, cg14370847, cg22711741
BRCA1	0.00177346	0.0245772	0.45506	-0.749963	-1.85034	9	cg25288140, cg24900425, cg18372208, cg06001716, cg26276233, cg16006004, cg02286533, cg25067162, cg14947218
RFPL2	0.000737746	0.015448	0.477271	-0.72814	-1.84621	10	cg05019187, cg26494441, cg13405775, cg25125450, cg06647818, cg22404498, cg12906381, cg24848192, cg01124132
MAGEE2	0.00086046	0.0165161	0.477271	-0.808906	-1.83069	7	cg27539023, cg11703777, cg05264033, cg05152459, cg11263793
S100A1	0.00196057	0.0254844	0.431708	-0.64892	-1.8215	14	cg00012362, cg13946767, cg06562291, cg11915664, cg11343894, cg02331910, cg02873163, cg19335413, cg11596404, cg27469660, cg02573566, cg17776284
S100A13	0.00356534	0.0410608	0.431708	-0.630682	-1.81634	15	cg00012362, cg13946767, cg06562291, cg11915664, cg11343894, cg02331910, cg02873163, cg19335413, cg11596404, cg27469660, cg02573566, cg17776284
KRTCAP3	0.0012383	0.019786	0.45506	-0.829567	-1.78305	6	cg17158414, cg12000995, cg21248554, cg24768116, cg12648201, cg04845466
CNKSR1	0.00128852	0.019786	0.45506	-0.865037	-1.743	5	cg00300879, cg15622158, cg19740054, cg17330765, cg26412358
OXT	0.00384503	0.0428535	0.431708	-0.767721	-1.73748	7	cg19776589, cg01644611, cg13725599, cg16887334, cg07747220, cg13285174, cg19592472
TTC23	0.00313808	0.0387217	0.431708	-0.801438	-1.72259	6	cg07732735, cg13401703, cg09146471, cg11640175, cg21416022, cg25385940
RERE	0.00199334	0.0254844	0.431708	-0.853873	-1.72051	5	cg23963229, cg14004768, cg07180616, cg19465883, cg16484858
MINOS1-NBL1	0.00425874	0.0459811	0.407018	-0.830618	-1.67365	5	cg12097634, cg10211745, cg14579430, cg15589641
RNF113A	0.00441239	0.0469071	0.407018	0.557349	1.82213	16	cg11190082, cg24831179, cg00988678, cg17339373, cg18107314, cg08841290, cg02340744
LOC144571	0.00393133	0.0431198	0.407018	0.708529	1.85083	8	cg03539765, cg13575925, cg20380214, cg10605084, cg02883147, cg26114124, cg23795048, cg04155231
GSTM5	0.00177838	0.0245772	0.45506	0.853508	1.8661	5	cg20803293, cg12858902, cg25210835, cg24467349, cg14377951
RP2	0.00467499	0.0482152	0.407018	0.61386	1.88438	13	cg10921219, cg14949922, cg08905118, cg04586456, cg22522913, cg24511534, cg14091713
ACTR3C	0.000950767	0.0177562	0.477271	0.872861	1.90842	5	cg01601712, cg03185704, cg18221429, cg06975979, cg00487984
RAP2C	0.00326655	0.038917	0.431708	0.612295	1.91106	14	cg02665122, cg05930514, cg27592925, cg06051391, cg13232664, cg04402486, cg07674503, cg08965337
LOC654433	0.00370835	0.0420077	0.431708	0.766893	1.91662	7	cg21482265, cg07594247, cg19083407, cg17445212, cg07772999, cg21550016, cg11763394
TSPYL2	0.00450484	0.0471643	0.407018	0.676859	1.91976	10	cg23612178, cg23696472, cg24779040, cg09904973
MTCP1NB	0.00338589	0.0396551	0.431708	0.772095	1.92962	7	cg22952406, cg18399551, cg05941375, cg08446187, cg13115118
BRCC3	0.00135601	0.0203697	0.45506	0.745854	1.94833	8	cg18399551, cg05941375, cg04508810, cg08446187, cg13115118
LDHC	0.0032323	0.038917	0.431708	0.691402	1.961	10	cg07093428, cg05740244, cg07398106, cg19767548, cg14332815, cg08418111, cg11821245, cg21471707, cg14259717, cg09332484
C1GALT1C1	0.00195863	0.0254844	0.431708	0.630756	1.96868	14	cg20670088, cg09238847, cg17149359, cg17197278, cg24054653, cg07210774, cg11816360, cg19780807, cg02274705, cg04255858, cg09662907, cg13376417
RUNX1	0.00202842	0.0254844	0.431708	0.79083	1.97645	7	cg00994804, cg12083928, cg09889857, cg06758350, cg12477880, cg14937633, cg20418711
MAOA	0.00103733	0.0186125	0.45506	0.607199	1.98511	16	cg15014034, cg04406445, cg16145609, cg05872972, cg22366618, cg06558952, cg19441691
MOBP	0.00105049	0.0186125	0.45506	0.842155	1.99538	6	cg03054684, cg23605644, cg07878407, cg05633900
CRISP2	0.00198262	0.0254844	0.431708	0.738426	2.00918	9	cg21710255, cg01706515, cg14997592, cg12440062, cg04595372, cg25390787, cg26715042, cg15509430
TACSTD2	0.000634792	0.0146214	0.477271	0.853065	2.02123	6	cg01821018, cg17210938, cg16080552, cg04863005, cg16699148, cg13443627
CLCN5	0.00116149	0.0195753	0.45506	0.578082	2.02605	19	cg25427918, cg02937293, cg01207755, cg21911363, cg23040203, cg01760027, cg03705894, cg20015269, cg16734817, cg00264378, cg23654968, cg23951868
CXorf58	0.00126557	0.019786	0.45506	0.661392	2.03029	13	cg26896756, cg19572135, cg08338641, cg17565795, cg10892068, cg03504002, cg22881447, cg04924696, cg05442715
OPHN1	0.00155756	0.0224224	0.45506	0.717097	2.03388	10	cg07940380, cg12584551, cg14828865, cg11264711, cg19406135, cg17718322
SAT1	0.0014775	0.0217224	0.45506	0.749198	2.03849	9	cg12544391, cg00431602, cg09725439, cg06406598, cg06579087
APEX2	0.000412914	0.010974	0.498493	0.784919	2.05038	8	cg13311758, cg26927606, cg19506937, cg26335568, cg06341336
ACOT9	0.00127898	0.019786	0.45506	0.723297	2.05147	10	cg24123780, cg24547622, cg12166502, cg12543132, cg26207017, cg04292836, cg08289016, cg16680922
CHST7	0.00112115	0.0193679	0.45506	0.680293	2.07546	12	cg10906138, cg13684763, cg00191052, cg00632374, cg07223177, cg01773478, cg26202131, cg05302212
MSL3	0.000685887	0.0148109	0.477271	0.588274	2.07708	20	cg19716713, cg16681914, cg02195366, cg05257947, cg13241003, cg15257930, cg13369210, cg24393665, cg01251131, cg05563333, cg04861534
TIMM17B	0.000684949	0.0148109	0.477271	0.622398	2.08484	17	cg14520448, cg11184697, cg25415674, cg08065501, cg26815962, cg21364772, cg21142420, cg12419383, cg10030436
TMEM185A	0.000812754	0.0160461	0.477271	0.737973	2.09309	10	cg00691480, cg16501779, cg16091895, cg24608181, cg12883250, cg23299576, cg03157806, cg19523014
MTMR1	0.000794134	0.0160461	0.477271	0.710554	2.10533	11	cg04075675, cg23759693, cg07799491, cg03056849, cg02539843, cg01079126, cg20455959, cg21202708, cg08825853
ELK1	0.000616377	0.0146214	0.477271	0.716985	2.12439	11	cg13058551, cg07038409, cg24376810, cg17399684, cg14258356, cg02291897, cg11111083, cg13023833, cg11653864, cg09880872
G6PD	0.00037826	0.0104551	0.498493	0.556375	2.1333	24	cg20077602, cg07215528, cg24156746, cg12536534, cg01058588, cg02869694, cg00813156, cg08873063, cg08417382, cg14918074, cg01466089, cg23680829, cg13014982
NDUFA1	0.000551446	0.0141129	0.477271	0.705977	2.15382	12	cg11190082, cg24831179, cg00988678, cg17339373, cg18107314, cg02340744
OTUD5	0.000620633	0.0146214	0.477271	0.579484	2.16638	23	cg18780401, cg18112782, cg27277239, cg02573613, cg08221357, cg15925199, cg00680673, cg07750402, cg16023936, cg09985072, cg03831206, cg03835117, cg26201401
SSR4	0.0002628	0.00756645	0.498493	0.651357	2.18185	17	cg14783837, cg24664551, cg26035633, cg22784592, cg01154480, cg06137672, cg14145674, cg04836992, cg09700325, cg07187289, cg25123033, cg27271445, cg11520843, cg22903370
ZNF673	0.000234331	0.00704012	0.518848	0.743527	2.20303	11	cg23919845, cg26778571, cg23127995, cg08118032, cg19748438, cg15617976, cg19257537, cg14260918, cg04395332, cg15008991
MOSPD2	0.000125133	0.00432335	0.518848	0.707748	2.20898	14	cg18426655, cg18132745, cg08969352, cg15255859, cg19235109, cg15117507
MTCP1	0.000154423	0.00485029	0.518848	0.77949	2.21084	10	cg22952406, cg18399551, cg05941375, cg04508810, cg08446187, cg00671229, cg13115118
OR2L13	8.12559e-05	0.00311932	0.538434	0.829366	2.25662	9	cg09506600, cg08861456, cg20434529, cg03748376, cg00785941, cg08944170, cg20507276
FANCB	5.88709e-05	0.00254249	0.557332	0.729962	2.27831	14	cg18426655, cg18132745, cg08969352, cg15255859, cg19235109, cg15117507
PGK1	3.97678e-05	0.00211381	0.557332	0.811206	2.3008	10	cg00832270, cg09790289, cg00151234, cg26744454, cg13203541, cg14794494, cg15418221
MAGED2	7.49863e-05	0.00304797	0.538434	0.756253	2.3072	12	cg22660483, cg07767690, cg00690049, cg18924561, cg09208571, cg08395108, cg22674664, cg17473615
PQBP1	0.000145892	0.00480056	0.518848	0.600866	2.33773	25	cg01303569, cg14520448, cg11184697, cg23280339, cg06297686, cg26418790, cg25415674, cg08065501, cg26815962, cg21364772, cg21142420, cg12419383, cg10030436
MIR886	4.86309e-06	0.000596073	0.610527	0.935477	2.33795	7	cg00124993, cg08745965, cg25340688, cg06536614, cg18678645, cg26896946, cg18797653
TMEM232	9.44181e-06	0.000815536	0.593325	0.785406	2.45136	14	cg22429640, cg23279021, cg06414816, cg20963261, cg25259944, cg11641395, cg06429214, cg19398821, cg17946588, cg10597099, cg27037608, cg17248924, cg19526166, cg26583412
EFNB1	3.14688e-05	0.00197681	0.557332	0.701478	2.47678	20	cg04932755, cg22151131, cg24139739, cg01081720, cg09109599, cg09867302, cg15977272, cg05849149, cg19056391
HOXA5	2.79478e-05	0.0019312	0.57561	0.756807	2.67213	20	cg00969405, cg25506432, cg17432857, cg03368099, cg14014955, cg25307665, cg20817131, cg19759481, cg01323381, cg17569124, cg02916332, cg14882265, cg02005600, cg09207400, cg23936031, cg26023912, cg02646423, cg20517050, cg04863892
RUFY1	6.62495e-06	0.000653977	0.610527	0.875369	2.73215	14	cg26516362, cg06118287, cg20199595, cg01955137, cg08058472, cg05457628, cg02136620, cg09060608, cg25658438, cg22764044, cg21226059, cg00080972, cg14820908, cg19626725

## Sheet: S3
Differentially methylated region analysis - Symptom trajectory (ΔPHQ-9)
	pval	padj	log2err	ES	NES	size	leadingEdge
HOXA4	6.7012e-07	6.61504e-05	0.659444	-0.830599	-2.3205	15	cg23884241, cg14359292, cg04317399, cg11015251, cg25952581, cg07317062, cg11410718, cg03724423, cg24169822, cg08657492, cg17457637, cg19142026, cg22997113, cg16651126
S100A1	3.10338e-06	0.000238271	0.627257	-0.804618	-2.19868	14	cg11915664, cg13946767, cg02331910, cg02873163, cg00012362, cg11343894, cg06562291, cg17776284, cg19335413, cg27469660, cg11596404, cg07898899, cg01347250, cg02573566
S100A13	1.68805e-05	0.0010604	0.57561	-0.782191	-2.18526	15	cg11915664, cg13946767, cg02331910, cg02873163, cg00012362, cg11343894, cg06562291, cg17776284, cg19335413, cg27469660, cg11596404, cg07898899, cg01347250, cg02573566
TNNT1	4.64747e-08	8.0285e-06	0.719513	-0.96134	-2.08867	7	cg09332180, cg19504245, cg18649823, cg24699670, cg10218876, cg22711187, cg07189381
DDX43	9.60624e-07	8.29739e-05	0.643552	-0.938475	-2.039	7	cg03669949, cg16143502, cg14556503, cg08124399, cg12045875, cg15936068, cg17188169
ATP6V1C1	8.64557e-08	1.1802e-05	0.704976	-0.983474	-1.96029	5	cg08793540, cg14877637, cg22150661, cg21442626, cg14341424
TMEM72	1.02478e-07	1.1802e-05	0.704976	-0.982718	-1.95878	5	cg06994016, cg13319266, cg04218760, cg05187965, cg26700422
MAGEE2	0.000676491	0.0259697	0.477271	-0.831272	-1.80608	7	cg11703777, cg27539023, cg11263793, cg05690949, cg05152459, cg05264033
ZNF577	0.00153059	0.0459843	0.45506	-0.806925	-1.75318	7	cg23010048, cg10783469, cg09547119, cg24794228, cg11269599, cg22472290
LOC221442	0.000933282	0.033942	0.477271	0.894165	1.90601	5	cg02167203, cg06671660, cg03644281, cg04346459, cg09580153
SOSTDC1	0.000546776	0.0222248	0.477271	0.905572	1.93033	5	cg13864794, cg07220448, cg11417025, cg06126713, cg06363129
RUNX1	0.00109055	0.0376784	0.45506	0.811647	1.94291	7	cg09889857, cg12083928, cg00994804, cg06758350, cg14937633, cg12477880, cg20418711
DSE	0.000165415	0.00879245	0.518848	0.925379	1.97255	5	cg22556008, cg07407886
CD24	0.00152801	0.0459843	0.45506	0.795153	1.9889	8	cg13438027, cg23654549, cg01150227, cg16227841, cg04226674, cg02351050
CRISP2	0.00131471	0.0432603	0.45506	0.754311	1.99965	9	cg21710255, cg01706515, cg14997592, cg12440062, cg04595372, cg25390787, cg15509430, cg26715042
GSTM5	5.79371e-06	0.000400346	0.610527	0.960732	2.04791	5	cg20803293, cg14377951, cg25210835, cg12858902, cg24467349
RUFY1	0.000225519	0.011131	0.518848	0.70671	2.08539	14	cg01955137, cg02136620, cg22764044, cg06118287, cg26516362, cg08058472, cg20199595, cg25658438, cg09060608, cg05457628, cg21226059
HCFC1	0.000534535	0.0222248	0.477271	0.754315	2.14009	11	cg11778030, cg05103731, cg08627233, cg03177323, cg10155960, cg07086565, cg03672915, cg09222696, cg13937627, cg21960840
LOC144571	0.000105251	0.0060607	0.538434	0.862516	2.1574	8	cg03539765, cg10605084, cg13575925, cg02883147, cg04155231, cg20380214, cg23795048, cg26114124
LDHC	0.000314735	0.0144988	0.498493	0.783529	2.16137	10	cg05740244, cg07093428, cg07398106, cg19767548, cg14332815, cg11821245, cg08418111, cg21471707, cg14259717
MIR886	2.28565e-10	7.89694e-08	0.826657	0.981133	2.34863	7	cg00124993, cg18797653, cg08745965, cg18678645, cg06536614, cg25340688, cg26896946
TMEM232	5.75743e-09	1.32613e-06	0.761461	0.879806	2.59617	14	cg22429640, cg20963261, cg23279021, cg11641395, cg19398821, cg25259944, cg06429214, cg19526166, cg17248924, cg10597099, cg17946588, cg27037608, cg06414816, cg26583412
HOXA5	8.11526e-11	5.60764e-08	0.839089	0.85599	2.81087	20	cg25506432, cg14014955, cg20817131, cg00969405, cg19759481, cg17432857, cg02005600, cg01323381, cg17569124, cg03368099, cg02646423, cg04863892, cg02916332, cg25307665, cg09207400, cg20517050, cg14882265, cg23936031, cg26023912, cg09549073

## Sheet: S4
Differentially methylated region analysis - Remission Status
	pval	padj	log2err	ES	NES	size	leadingEdge
PCDH19	3.9745e-06	0.00021126	0.610527	-0.708836	-2.31195	22	cg11109182, cg13775533, cg01353903, cg03769817, cg00584971, cg26784310, cg20597646, cg12646252, cg19840763, cg05032903, cg03598440, cg14725392, cg14651363, cg26011713, cg19407410, cg13510054, cg26401825
ZNF577	6.84005e-09	4.72647e-06	0.761461	-0.977038	-2.24684	7	cg23010048, cg11269599, cg24794228, cg09547119, cg22472290, cg10783469, cg03562414
LONRF3	5.29467e-06	0.000243908	0.610527	-0.759966	-2.23826	16	cg22662205, cg26682103, cg19810816, cg06944050, cg13548793, cg08405463, cg12255092, cg20749341, cg17544225, cg21183872, cg07271820, cg16590821, cg26756979
DNASE1L1	7.17417e-06	0.000308154	0.610527	-0.685297	-2.23518	22	cg12591318, cg14453693, cg19310420, cg04712194, cg06124711, cg15499467, cg18827179, cg16405946, cg21459545, cg12413138, cg23387422, cg03670113, cg21153181, cg24834461, cg05100268, cg07195469, cg19421044, cg20329959, cg06084034
BCAP31	7.58121e-06	0.000308154	0.610527	-0.683288	-2.22863	22	cg17174422, cg26845351, cg13747960, cg00621925, cg23496593, cg18244029, cg25508573, cg04440464, cg06018273, cg23718917, cg06041068, cg21414424, cg07761358, cg03753611, cg02205962, cg27453644, cg09594760, cg21681732, cg15002478
IKBKG	2.26976e-06	0.0001307	0.627257	-0.628698	-2.21916	31	cg25785367, cg13550079, cg26279840, cg03818545, cg25479128, cg06554760, cg16915302, cg14397289, cg01058588, cg02742139, cg08560117, cg08873063, cg20450662, cg02041067, cg24156746, cg02869694, cg08417382, cg23680829, cg20077602, cg14918074, cg07215528, cg14013497, cg15535487
ABCD1	9.65902e-06	0.000370799	0.593325	-0.68198	-2.19516	21	cg17174422, cg26845351, cg13747960, cg00621925, cg23496593, cg18244029, cg25508573, cg04440464, cg06018273, cg23718917, cg06041068, cg21414424, cg03753611, cg02205962, cg27453644, cg09594760, cg21681732, cg15002478
MSL3	1.43769e-05	0.000451566	0.593325	-0.686472	-2.17433	20	cg24195365, cg03147775, cg23819883, cg04861534, cg01251131, cg19716713, cg02195366, cg13241003, cg01683788, cg20775112, cg15257930, cg05257947, cg16681914, cg13369210, cg02647401, cg05563333, cg23484208
SLITRK2	1.38463e-05	0.000451566	0.593325	-0.691489	-2.17022	19	cg25125622, cg18337321, cg10448608, cg21362390, cg25062147, cg04642759, cg03020597, cg19332075, cg13663706, cg10016783, cg14533133, cg08609270, cg18701656, cg22213420, cg03059667
SOX3	2.27381e-05	0.000628481	0.57561	-0.69593	-2.14423	18	cg01293271, cg07929406, cg14137819, cg18496053, cg06152434, cg11638117, cg11409998, cg25384790, cg06902764, cg26369916, cg02847500, cg13072112, cg23862713, cg18581963
DDX43	6.98711e-07	7.39665e-05	0.659444	-0.93204	-2.14336	7	cg03669949, cg16143502, cg17188169, cg08124399, cg14556503, cg12045875, cg15936068
DUSP9	2.98029e-05	0.000790447	0.57561	-0.654642	-2.13519	22	cg27054331, cg09163457, cg01337817, cg02830187, cg17291699, cg18989810, cg05085049, cg06776257, cg10538243, cg18523259, cg26159385
FGF13	5.63399e-05	0.00117972	0.557332	-0.56076	-2.12635	42	cg01245531, cg01241775, cg07330723, cg05196026, cg14984253, cg21040569, cg00412368, cg07768177, cg02961533, cg11550546, cg08349204, cg20271300, cg00850648, cg25078813, cg08791697, cg01777017, cg00857129, cg16199038, cg25645840, cg07653699, cg24401557, cg04474375, cg16550399, cg02629737, cg09656426, cg12620378
CD40LG	1.22446e-06	8.52179e-05	0.643552	-0.924295	-2.12555	7	cg09226411, cg21302055, cg16468913, cg11944101, cg23907260, cg27207932
GNL3L	6.12187e-05	0.00121681	0.538434	-0.714555	-2.10451	16	cg20973408, cg02645808, cg05193149, cg07946630, cg00046099, cg19791442, cg16412513, cg24579162, cg22164912, cg13441872, cg17376045, cg25496792, cg12620265
HOXA4	4.68905e-05	0.00105817	0.557332	-0.722802	-2.10433	15	cg23884241, cg14359292, cg24169822, cg04317399, cg11015251, cg19142026, cg25952581, cg03724423, cg11410718, cg22997113, cg17457637, cg07317062, cg08657492, cg16651126
S100A1	4.74721e-05	0.00105817	0.557332	-0.735549	-2.09276	14	cg11915664, cg27469660, cg07898899, cg11343894, cg02873163, cg13946767, cg11596404, cg06562291, cg01347250, cg00012362, cg02331910, cg17776284, cg19335413, cg02573566
HMGB3	6.16328e-05	0.00121681	0.538434	-0.678077	-2.08922	18	cg14361873, cg01807728, cg05379196, cg12284142, cg11186981, cg05935584, cg25685741, cg06136002, cg00963467, cg20662859, cg22876425
CXorf57	4.12532e-05	0.000982965	0.557332	-0.782664	-2.07228	11	cg06667703, cg14057181, cg16930518, cg03057808, cg26777746, cg12861974, cg11111131, cg19398192
CHST7	7.15612e-05	0.00137358	0.538434	-0.757596	-2.051	12	cg05302212, cg11364153, cg07223177, cg26202131, cg09340741, cg04872051, cg00632374, cg01483252
MAP3K7IP3	0.000226954	0.00313651	0.518848	-0.735035	-2.04781	13	cg07151929, cg09998474, cg09319393, cg20372745, cg05204193, cg25416923, cg05837905, cg13788004, cg17125742, cg12171481, cg27301033, cg20057595
G6PD	0.000115922	0.00210795	0.538434	-0.612207	-2.04536	24	cg13550079, cg06554760, cg16915302, cg14397289, cg01058588, cg02742139, cg08560117, cg08873063, cg20450662, cg02041067, cg24156746, cg02869694, cg08417382, cg23680829, cg20077602, cg14918074, cg07215528, cg15535487
S100A13	0.000154767	0.00243054	0.518848	-0.70072	-2.04004	15	cg11915664, cg27469660, cg07898899, cg11343894, cg02873163, cg13946767, cg11596404, cg06562291, cg01347250, cg00012362, cg02331910, cg17776284, cg19335413, cg02573566
EIF4E	5.15311e-05	0.00111275	0.557332	-0.869223	-1.9989	7	cg11037477, cg12527684, cg14972143, cg15633390, cg00876501, cg18160135, cg21554861
FAM155B	0.000198806	0.00304957	0.518848	-0.701905	-1.99704	14	cg15248636, cg09060772, cg09146364, cg07462256, cg05666266, cg15691129, cg26584772, cg24626756, cg01759889, cg11329209, cg22776211, cg16970748, cg15788661
SLC25A14	0.000135685	0.00228679	0.518848	-0.753804	-1.99587	11	cg04821091, cg16764296, cg24721916, cg20859738, cg04493740, cg02898382, cg06734027, cg10717149
FLJ30058	0.00020301	0.00304957	0.518848	-0.664767	-1.99519	17	cg08046324, cg04486022, cg27204474, cg24813163, cg25548414, cg14828248, cg04308274, cg25223408, cg09407917, cg02534780
ATP6V1C1	1.94593e-06	0.00012224	0.627257	-0.957563	-1.99284	5	cg22150661, cg14877637, cg08793540, cg14341424, cg21442626
FAM120C	0.000139573	0.00229631	0.518848	-0.774536	-1.98871	10	cg03334316, cg15450782, cg08199506, cg13183496, cg13649400, cg01579322, cg14453947, cg04326875
ARHGEF6	0.000380709	0.0043845	0.498493	-0.681517	-1.98414	15	cg24333508, cg01134144, cg15855671, cg18796619, cg12393338, cg17753039, cg08078522, cg01131699, cg09517019, cg17204993
GLA	0.000213668	0.00307593	0.518848	-0.732715	-1.98364	12	cg04044694, cg15854321, cg19528502, cg20919227, cg18920427, cg01461762, cg11663393, cg18502619, cg18818432, cg15481221
HNRNPH2	0.000213668	0.00307593	0.518848	-0.732715	-1.98364	12	cg04044694, cg15854321, cg19528502, cg20919227, cg18920427, cg01461762, cg11663393, cg18502619, cg18818432, cg15481221
CDX4	0.000153981	0.00243054	0.518848	-0.771859	-1.98183	10	cg20663980, cg19376305, cg01135626, cg25988710, cg12017815
GABRQ	0.000129077	0.00222981	0.518848	-0.825545	-1.98013	8	cg05849875, cg00529027, cg21864225, cg24202706, cg19137564, cg23990273, cg18769303
HMGN5	0.000443577	0.00502478	0.498493	-0.67728	-1.9718	15	cg21791702, cg26937530, cg22539150, cg01348758, cg18116135, cg12650780, cg08222309, cg06144825, cg05474077, cg00008945, cg23872179
ESX1	0.000902592	0.00813632	0.477271	-0.704493	-1.96272	13	cg04721883, cg03447800, cg07822777, cg09525227, cg22818965, cg05788681, cg18904224, cg05777666, cg19603571
LGR6	1.05001e-05	0.000381872	0.593325	-0.940111	-1.95652	5	cg04811114, cg06825163, cg25270774, cg05044291, cg26347746
MPP1	0.000373152	0.00437031	0.498493	-0.64841	-1.94609	17	cg12623997, cg03728333, cg02604836, cg00213853, cg25645693, cg25813820, cg08786860, cg02994943, cg10072574, cg09056691, cg05423956, cg22858728
PQBP1	0.000544306	0.00587681	0.477271	-0.57315	-1.9428	25	cg19840133, cg27403913, cg21537947, cg21142420, cg26418790, cg10030436, cg08065501, cg06297686, cg01303569, cg21364772, cg11184697, cg25415674, cg04769268, cg11857742, cg09909221, cg14520448
NHS	0.000316637	0.00405178	0.498493	-0.733465	-1.94202	11	cg14345281, cg02042142, cg13418665, cg00458505, cg20713636, cg08588626
XKRX	0.000367884	0.00437031	0.498493	-0.730075	-1.93304	11	cg16592242, cg25433595, cg03845409, cg08491357, cg17256404, cg11664825, cg01543116
NR0B1	0.000680344	0.00671597	0.477271	-0.653919	-1.92593	16	cg15888279, cg22705954, cg23208903, cg13124710, cg08415785, cg16104634, cg10291990, cg22696549, cg11869614, cg05137263
IGSF1	0.000291849	0.00380505	0.498493	-0.775416	-1.916	9	cg16328412, cg18452672, cg01010618, cg10743239, cg12162305, cg13349581, cg23694557
EDA	0.000581012	0.00617609	0.477271	-0.707012	-1.91406	12	cg20540913, cg20780119, cg16059374, cg21881821, cg24186901, cg16221895, cg02714492, cg26617508, cg05491276, cg21634944
DKC1	0.000357107	0.00432914	0.498493	-0.769125	-1.90046	9	cg09055253, cg13033283, cg08087512, cg19944582, cg14369777, cg09411587, cg23712855, cg15043492
CNKSR2	0.000667622	0.00668589	0.477271	-0.701077	-1.89799	12	cg26267038, cg13736842, cg15369199, cg19807373, cg18492813, cg05444994, cg20484507, cg13616735, cg09252204, cg16767700
FLNA	0.00207121	0.0152405	0.431708	-0.680166	-1.89495	13	cg21323637, cg11851349, cg23527532, cg23868623, cg03691313, cg15391239, cg16742675, cg08583823
SASH3	0.000658396	0.00668589	0.477271	-0.734965	-1.8871	10	cg02200373, cg05872215, cg05414556, cg07313072, cg18091964, cg04499381, cg07172550, cg22474124, cg10649042, cg02283402
RNF113A	0.00119737	0.0102146	0.45506	-0.639076	-1.88221	16	cg00607036, cg06921685, cg14541939, cg11190082, cg25375329, cg07863318, cg18107314, cg12196769, cg15755924, cg24831179, cg08841290
WDR13	0.000506428	0.00564422	0.477271	-0.761078	-1.88057	9	cg07219295, cg25547663, cg06027835, cg20219360, cg24351198, cg18636716
VBP1	0.000746758	0.00711453	0.477271	-0.708933	-1.87706	11	cg23214992, cg27257939, cg12324831, cg20344426, cg00618396, cg24194941, cg16091746, cg19548593
ZBTB33	0.000826151	0.00771447	0.477271	-0.728401	-1.87025	10	cg09186478, cg02649608, cg22569627, cg24783624, cg06482328, cg10981178
PRICKLE3	0.000666734	0.00668589	0.477271	-0.755513	-1.86683	9	cg26950400, cg03685263, cg21513542, cg19344820, cg10896204, cg01733439, cg11583848, cg04675919
KLHL34	0.000906652	0.00813632	0.477271	-0.689504	-1.86666	12	cg21655480, cg04488527, cg20312916, cg12423482, cg01828474, cg25127732, cg06775759, cg01640808, cg25888700
MOV10L1	0.000529256	0.00580501	0.477271	-0.850846	-1.85839	6	cg24864161, cg03860256, cg12881363
IL1RAPL1	0.0007396	0.00711453	0.477271	-0.751253	-1.8563	9	cg26810336, cg04808637, cg04564438, cg09868328, cg23329028
PGK1	0.000972369	0.00861419	0.477271	-0.719897	-1.84842	10	cg07781082, cg24657313, cg09790289, cg13203541, cg15418221, cg00832270, cg14794494
TNFRSF6B	0.000254053	0.00337598	0.498493	-0.886023	-1.84396	5	cg07620230, cg14697761, cg24354818, cg16702083, cg23773946
SLITRK4	0.00150739	0.0125494	0.45506	-0.613997	-1.84281	17	cg23690264, cg21311654, cg12842316, cg27296664, cg10288278, cg26943822, cg15338502, cg20486825, cg09054333, cg25237542, cg09720420
CFP	0.000751607	0.00711453	0.477271	-0.798835	-1.83703	7	cg01798375, cg21648502, cg04144603, cg26672162, cg17662177, cg02952729
CXorf40B	0.00201407	0.0152405	0.431708	-0.644715	-1.83432	14	cg22307470, cg07089242, cg02973971, cg22827938, cg17712673, cg08663085, cg19428430, cg09610589, cg09773839
ZDHHC9	0.00209329	0.0152405	0.431708	-0.621907	-1.83164	16	cg22944282, cg17236781, cg25279183, cg15703000, cg11673471, cg16076396, cg10956264, cg20790618, cg11647489, cg13918312, cg08147831, cg06908232, cg20792978
MOSPD1	0.00111859	0.0096618	0.45506	-0.712385	-1.82913	10	cg16259583, cg03941517, cg00343954, cg13935560, cg05965444, cg04980470, cg25206026, cg08991015
ATP6AP1	0.000344382	0.0043165	0.498493	-0.877175	-1.82554	5	cg22552602, cg19168249, cg10519228, cg00645049, cg04149024
EFNB1	0.00371982	0.0228138	0.431708	-0.571718	-1.81086	20	cg20097093, cg22151131, cg00373606, cg10950297, cg05849149, cg19056391, cg10274815, cg02775175, cg15977272, cg12753358, cg09109599, cg24139739, cg00823357, cg04368919
ZC4H2	0.00185141	0.0145378	0.45506	-0.667361	-1.80671	12	cg08349033, cg23926715, cg16359563, cg08810486, cg05072636, cg06327799, cg11049305
MAP3K15	0.00202635	0.0152405	0.431708	-0.664609	-1.79926	12	cg07971493, cg13121076, cg25940844, cg12717800, cg15906052, cg07211915, cg00504583, cg06615444, cg05958126, cg18817143
RBMX	0.00139157	0.0117265	0.45506	-0.781911	-1.79811	7	cg21547183, cg00940232, cg13682241, cg04419618, cg12517167, cg14642832
SH3BGRL	0.00209529	0.0152405	0.431708	-0.678521	-1.79654	11	cg21791702, cg26937530, cg22539150, cg01348758, cg08222309, cg06144825, cg05474077, cg23872179
BRCC3	0.00177296	0.0141986	0.45506	-0.748062	-1.79428	8	cg13115118, cg05461361, cg18399551, cg04508810, cg08446187
PPP1R3F	0.00652042	0.0336239	0.407018	-0.643739	-1.79346	13	cg02156782, cg13744306, cg10723556, cg14051366, cg21905818, cg03748372, cg02882301, cg15224006, cg16403901
RBM3	0.00311968	0.0212453	0.431708	-0.608648	-1.79259	16	cg12251508, cg20657691, cg17290099, cg24741068, cg25656978, cg11098911, cg27124847, cg26155374, cg11524947, cg18382400
TMLHE	0.00166046	0.0136593	0.45506	-0.697797	-1.79167	10	cg06659128, cg25529319, cg00763725, cg12115116, cg12403148, cg07311845, cg01747155, cg26540943
ZNF674	0.0042253	0.0249546	0.407018	-0.615334	-1.79146	15	cg07180360, cg05237609, cg17475505, cg00805116, cg25441577, cg26301245, cg08874821, cg01166930
FHL1	0.004112	0.0244947	0.407018	-0.548529	-1.78909	22	cg02193580, cg09167861, cg05517106, cg14295696, cg25289658, cg20999651, cg25445853, cg12461044, cg01742836, cg14119069
RPL10	0.0039332	0.0238407	0.407018	-0.626761	-1.78324	14	cg14378311, cg18093711, cg23408987, cg17195879, cg02871887, cg16431713, cg20781383, cg11894108, cg18923230, cg00375105, cg27207144
IRAK1	0.00169011	0.0137396	0.45506	-0.772597	-1.7767	7	cg01353347, cg16746961, cg03050491, cg18312428, cg19572242, cg27616996, cg27167979
DLG3	0.00373076	0.0228138	0.431708	-0.518233	-1.76947	26	cg03894002, cg01600123, cg13783167, cg13077484, cg24376537, cg23708288, cg24264679, cg04368658, cg19616372, cg23429746, cg13781574, cg16394734, cg24658899, cg00223677, cg18515307, cg10830546, cg10729169, cg25189177
CUL4B	0.00552974	0.029852	0.407018	-0.604781	-1.76073	15	cg23215575, cg03754195, cg08784874, cg07480829, cg15815114, cg04464742, cg26505478, cg25698940
SYP	0.00268216	0.0187209	0.431708	-0.733679	-1.75978	8	cg15199886, cg12521790, cg09227616, cg10983111, cg12865398
TIMM17B	0.00370919	0.0228138	0.431708	-0.585956	-1.75865	17	cg27403913, cg21537947, cg21142420, cg10030436, cg08065501, cg21364772, cg11184697, cg25415674, cg04769268, cg11857742, cg09909221, cg14520448
SLC16A2	0.00248729	0.0177188	0.431708	-0.710835	-1.75643	9	cg23137494, cg12829224, cg06277838, cg04317640, cg06704717, cg09210933, cg03580328
RPL39	0.00313607	0.0212453	0.431708	-0.662457	-1.75401	11	cg11186637, cg15050093, cg07908142, cg02129889, cg04327763, cg00622384, cg16984885, cg03679005, cg15341874, cg13655660
TNNT1	0.0023482	0.0169021	0.431708	-0.760892	-1.74978	7	cg24699670, cg19504245, cg09332180, cg10218876, cg18649823, cg22711187
LOC401588	0.00293779	0.0203001	0.431708	-0.800474	-1.74837	6	cg07180360, cg05237609, cg17475505, cg00805116, cg01166930
KLF8	0.00366251	0.0228138	0.431708	-0.645561	-1.74769	12	cg21327343, cg05559795, cg06655100, cg09195491, cg03610137, cg11890740, cg19505129
RAP2C	0.005828	0.0312182	0.407018	-0.614172	-1.74742	14	cg05930514, cg02665122, cg25549819, cg07674503, cg26700574, cg06051391, cg19936302, cg04402486
HDX	0.00325554	0.021834	0.431708	-0.657332	-1.74044	11	cg19514725, cg06936709, cg15336560, cg14873818, cg19321437, cg03039483, cg16107992
TBX22	0.00344161	0.0219989	0.431708	-0.724228	-1.73711	8	cg15375586, cg00554969, cg13951651, cg12025642
PHKA1	0.00344161	0.0219989	0.431708	-0.724008	-1.73659	8	cg11806565, cg20340631, cg09966745, cg05707815, cg26621249, cg26842946, cg25858008, cg18976803
TMEM72	0.00178767	0.0141986	0.45506	-0.832838	-1.73327	5	cg04218760, cg05187965, cg06994016, cg13319266, cg26700422
RPL36A	0.00345546	0.0219989	0.431708	-0.6745	-1.73185	10	cg12920408, cg12440269, cg22682567, cg09738386, cg01410230, cg04025582, cg17258276
GPR101	0.00484175	0.0276548	0.407018	-0.572272	-1.71758	17	cg17328397, cg05566296, cg25075069, cg14007036, cg13937075, cg21179956, cg06223806, cg06164717, cg01228667, cg13658640
SEPT6	0.00484259	0.0276548	0.407018	-0.715844	-1.717	8	cg25553791, cg09581098, cg18641697, cg20844861
DOCK11	0.00484259	0.0276548	0.407018	-0.715729	-1.71673	8	cg27062326, cg26023405, cg17547524, cg22575892, cg00112256, cg05240083, cg04061482
IGBP1	0.00404612	0.0243119	0.407018	-0.6676	-1.71414	10	cg04856605, cg20825323, cg17847781, cg25528264, cg08275242, cg02497062
PDE9A	0.00255161	0.0179914	0.431708	-0.823539	-1.71392	5	cg16784985, cg23590273, cg26772386
MCTS1	0.00849234	0.039508	0.38073	-0.582699	-1.69644	15	cg01409204, cg13741548, cg04777103, cg00357087, cg03900860, cg10536534, cg21233518, cg03927113, cg24931094, cg12047536, cg17246352
FANCB	0.0096363	0.0436722	0.38073	-0.596192	-1.69627	14	cg08437835, cg25845992, cg18132745, cg19740287, cg11648471, cg15117507, cg19235109, cg08969352
CHRDL1	0.00499118	0.0280399	0.407018	-0.659267	-1.69274	10	cg16140952, cg16637019, cg07051329, cg12485020, cg25903474, cg05921207
ZSCAN12L1	0.00347015	0.0219989	0.431708	-0.813314	-1.69263	5	cg11517269, cg09156207, cg12623302, cg17849569, cg02631126
SYN1	0.00499118	0.0280399	0.407018	-0.658826	-1.69161	10	cg13839778, cg00779763, cg03765359, cg13532885, cg22265142, cg01345087, cg05093677
OTUD5	0.00949664	0.0435302	0.38073	-0.509608	-1.69114	23	cg02480419, cg09985072, cg07750402, cg15925199, cg13574945, cg00680673, cg16023936, cg12298823, cg26201401, cg21758197, cg18112782, cg14006678, cg08221357, cg03831206, cg03711046
NRK	0.00516838	0.0284753	0.407018	-0.657694	-1.6887	10	cg11194545, cg20512370, cg08573069, cg20232308, cg27606669
MIR718	0.00702115	0.03537	0.407018	-0.772578	-1.68743	6	cg16746961, cg03050491, cg18312428, cg19572242, cg27616996, cg27167979
CHN2	0.00726968	0.0361392	0.407018	-0.76986	-1.6815	6	cg06926818, cg09964316, cg23687322, cg17822452, cg13385408
RFPL2	0.00552278	0.029852	0.407018	-0.653624	-1.67825	10	cg26494441, cg05019187, cg24848192, cg13405775, cg06647818, cg25125450, cg22404498, cg12906381
NCRNA00087	0.00426857	0.0249965	0.407018	-0.804827	-1.67497	5	cg05600581, cg09058241, cg18833705, cg02523105
BEX5	0.00599531	0.0316241	0.407018	-0.651506	-1.67281	10	cg14793790, cg00400999, cg03993934, cg16567137, cg04924736, cg11673013, cg04599817
SPIN4	0.00683723	0.0347391	0.407018	-0.676911	-1.6726	9	cg09022442, cg01314643, cg07309821, cg09070199
YIPF6	0.00752935	0.0371627	0.407018	-0.696742	-1.67119	8	cg03939693, cg19605909, cg25790081, cg12039967, cg19776404, cg00604086
PRAF2	0.00666328	0.0341061	0.407018	-0.631124	-1.67104	11	cg10848980, cg18011534, cg07649160, cg21785054, cg01191902, cg10101479, cg24426788, cg11286196
MID2	0.00706375	0.03537	0.407018	-0.647427	-1.66234	10	cg04745408, cg02061213, cg25227163, cg02454670, cg15552475, cg19771541, cg00150363
SPIN3	0.0077742	0.0375752	0.407018	-0.692932	-1.66205	8	cg20945035, cg23154024, cg10827006, cg12530936, cg03828160, cg08113756
PPP1R3B	0.00598826	0.0316241	0.407018	-0.795619	-1.65581	5	cg05806645, cg09774589, cg20438142, cg02269453
BEX4	0.00777605	0.0375752	0.407018	-0.644197	-1.65405	10	cg21039523, cg17294479, cg11082424, cg15582794, cg07492878, cg24790801, cg01374431, cg12464216
INGX	0.0109976	0.0472011	0.38073	-0.755718	-1.65061	6	cg27558057, cg08630881, cg21811592, cg17970282, cg15907464
SLC10A3	0.0081322	0.0387581	0.38073	-0.641811	-1.64792	10	cg11233153, cg06616857, cg06266461, cg03210912, cg09418475, cg08648877
CASK	0.00834407	0.0392228	0.38073	-0.622303	-1.64769	11	cg23530509, cg15034216, cg12614178, cg12124890, cg23767642, cg17548613, cg03983969, cg02161125
ZNF41	0.00984514	0.0438903	0.38073	-0.54569	-1.6378	17	cg10067677, cg04302192, cg23534593, cg22713892, cg09020104, cg24559073, cg22238863, cg26176649, cg05526804, cg02124059, cg00775115, cg04575501, cg19867709, cg14388993
MAGEE2	0.00851909	0.039508	0.38073	-0.711909	-1.63714	7	cg27539023, cg11703777, cg11263793, cg05690949, cg20648827, cg05152459
FAM127A	0.00973302	0.0436722	0.38073	-0.682295	-1.63653	8	cg01099541, cg17058724, cg15043283, cg12205721, cg04922020, cg20653018, cg17558827
LOC100272228	0.0113557	0.0484368	0.38073	-0.659594	-1.62982	9	cg07089242, cg02973971, cg08663085, cg19428430, cg09610589, cg09773839
DIAPH2	0.00833243	0.0392228	0.38073	-0.780671	-1.6247	5	cg05699139, cg05023132, cg01831944
TMEM185A	0.0103878	0.0454302	0.38073	-0.631719	-1.62201	10	cg21030483, cg23299576, cg00691480, cg15568009, cg24608181, cg16091895
UXT	0.0106251	0.0461759	0.38073	-0.608333	-1.6107	11	cg00265812, cg21290550, cg10709704, cg14295009, cg16177032, cg06158088, cg16638301, cg19206010, cg06093412
LRRC17	0.0108013	0.0466479	0.38073	-0.768975	-1.60036	5	cg20485874, cg27481555, cg02724472, cg19561297
SLC38A4	0.0117888	0.0499758	0.38073	-0.765125	-1.59235	5	cg11331445, cg17501823, cg14671384, cg07601320, cg11146691
DDO	0.00626537	0.032651	0.407018	0.794569	1.73907	5	cg02872426, cg07164639, cg06413398, cg00804078
HS6ST2	0.00970201	0.0436722	0.38073	0.649947	1.75286	9	cg26093885, cg16508637, cg00098732, cg02447370, cg20465655
HIVEP3	0.0100353	0.0444514	0.38073	0.591874	1.75857	11	cg17220055, cg11735008, cg08872577, cg26038582, cg15542713
NAA10	0.0101075	0.044486	0.38073	0.671581	1.76582	8	cg01501311, cg22749239, cg00072288, cg07934435
IQSEC2	0.0095124	0.0435302	0.38073	0.743006	1.76636	6	cg23733328, cg00822998, cg06649034, cg13996925
GNAS	0.00813303	0.0387581	0.38073	0.751966	1.78766	6	cg07909402, cg23732978, cg24617313, cg07947033
GPM6B	0.00775483	0.0375752	0.407018	0.688027	1.80906	8	cg18627493, cg09521623, cg10479459, cg08844282, cg06452970
MOBP	0.00519231	0.0284753	0.407018	0.77064	1.83205	6	cg05633900, cg07878407, cg03054684, cg17816989, cg23605644
HTR2A	0.00201053	0.0152405	0.431708	0.837323	1.83265	5	cg15894389, cg10323433, cg20102280, cg27068143, cg11090759
LDHC	0.00518497	0.0284753	0.407018	0.66185	1.8807	10	cg05740244, cg07093428, cg07398106, cg11821245, cg19767548, cg14332815
PPT2	0.000863139	0.00795239	0.477271	0.860975	1.88441	5	cg06814287, cg13934406, cg23359665, cg06025456
RUNX1	0.00628449	0.032651	0.407018	0.758142	1.88745	7	cg00994804, cg09889857, cg06758350, cg12083928, cg20418711, cg12477880, cg14937633
CAPN6	0.00203607	0.0152405	0.431708	0.809013	1.92328	6	cg24149658, cg19688503, cg17582679, cg01659678, cg00426668
LOC221442	0.000349817	0.0043165	0.498493	0.883147	1.93294	5	cg02167203, cg04346459, cg03644281, cg06671660, cg09580153
PM20D1	0.00330425	0.021834	0.431708	0.653681	1.94221	11	cg26354017, cg07533224, cg12898220, cg14893161, cg14159672, cg07167872, cg24503407, cg05841700, cg11965913, cg07157834
RBM46	0.00331775	0.021834	0.431708	0.781801	1.94635	7	cg00137234, cg22496683, cg01289218, cg20745987, cg01827861
BCOR	0.000589901	0.00617609	0.477271	0.423429	1.96004	66	cg23424739, cg15366127, cg11434986, cg02169289, cg15386612, cg10039267, cg26695278, cg18813691, cg08156775, cg00389552, cg22346771, cg11049634, cg24156613, cg01906946, cg04101819, cg24183173, cg27428464, cg02693068, cg21180513, cg20338399, cg18765710, cg24508310, cg08174182, cg25300435, cg12111783, cg05559023, cg12045126, cg10055320, cg00206414, cg07234688, cg04751297, cg21010298, cg12360110, cg1…
PLD6	0.000109126	0.002038	0.538434	0.909308	1.9902	5	cg25393494, cg16340422, cg19093370, cg24578857
RUFY1	0.00100302	0.00877322	0.45506	0.644169	2.04426	14	cg01955137, cg02136620, cg22764044, cg06118287, cg08058472, cg20199595, cg26516362, cg09060608, cg21226059, cg25658438, cg14820908, cg05457628
GSTM5	1.67357e-05	0.000502799	0.57561	0.937527	2.05196	5	cg14377951, cg25210835, cg20803293, cg12858902, cg24467349
AQP11	1.43078e-05	0.000451566	0.593325	0.939502	2.05628	5	cg04518186, cg06061081, cg12586386, cg18349420, cg15441833
SOSTDC1	5.04785e-06	0.000243908	0.610527	0.952372	2.08445	5	cg07220448, cg13864794, cg11417025, cg06126713, cg06363129
LDHD	6.11098e-07	7.39665e-05	0.659444	0.970823	2.12484	5	cg16540789, cg09899215, cg03085549, cg24429836, cg03743982
OR2L13	0.00012626	0.00222981	0.518848	0.798816	2.15435	9	cg08861456, cg09506600, cg00785941, cg08944170, cg20507276, cg03748376, cg20434529
TMEM187	0.000221633	0.00312547	0.518848	0.678124	2.18781	15	cg10155960, cg23124111, cg05103731, cg11778030, cg08627233, cg07086565, cg03672915, cg03177323, cg21960840, cg09222696, cg13937627
MIR886	3.72952e-05	0.000920393	0.557332	0.883434	2.19937	7	cg18678645, cg00124993, cg25340688, cg18797653, cg08745965, cg26896946, cg06536614
HOXB6	0.000237958	0.0032241	0.518848	0.742319	2.20557	11	cg10906729, cg17179862, cg03803541, cg05900563, cg16848873, cg20471691, cg05888755, cg18684142, cg15435170, cg04588674
LDHAL6A	2.17987e-05	0.00062762	0.57561	0.891868	2.22037	7	cg15463284, cg26740318, cg14813083, cg05655707, cg07915343, cg18888461, cg06888460
HKR1	3.08858e-05	0.000790447	0.557332	0.833772	2.24863	9	cg24834889, cg05280698, cg12948621, cg08565796, cg10237978, cg12024906, cg26734888, cg23448505, cg23756236
CD24	1.55861e-07	3.58999e-05	0.690132	0.938327	2.46718	8	cg13438027, cg23654549, cg04226674, cg01150227, cg16227841, cg16061810, cg02351050, cg14683071
PRDM8	1.23325e-06	8.52179e-05	0.643552	0.774917	2.50009	15	cg19409579, cg00138041, cg27018912, cg10694470, cg26299084, cg05059566, cg27242132, cg22902505, cg06307913, cg18073471, cg03463411, cg27111250, cg27639662, cg03404272, cg10129063
HCFC1	7.49298e-07	7.39665e-05	0.659444	0.852048	2.5316	11	cg10155960, cg05103731, cg11778030, cg08627233, cg07086565, cg03672915, cg03177323, cg21960840, cg09222696, cg13937627, cg03189022
LOC144571	8.55008e-08	2.95405e-05	0.704976	0.969505	2.54916	8	cg03539765, cg02883147, cg04155231, cg23795048, cg13575925, cg10605084, cg20380214, cg26114124
TMEM232	8.73038e-07	7.54086e-05	0.659444	0.832192	2.64095	14	cg22429640, cg19398821, cg23279021, cg20963261, cg17248924, cg17946588, cg27037608, cg25259944, cg19526166, cg06429214, cg10597099, cg06414816, cg26583412, cg11641395
HOXA5	2.08305e-07	3.59847e-05	0.690132	0.856112	3.0191	20	cg25506432, cg19759481, cg20817131, cg14014955, cg02005600, cg17432857, cg00969405, cg02646423, cg04863892, cg17569124, cg02916332, cg01323381, cg20517050, cg09207400, cg09549073, cg25307665, cg26023912, cg23936031, cg14882265, cg03368099

## Sheet: S5
Differentially methylated BDNF promoter probes Treatment Response
	logFC	AveExpr	t	P.Value	adj.P.Val	B
cg10558494	-0.0156098	0.0605627	-3.51132	0.00123898	0.104075	-2.89691
cg25962210	-0.0175224	0.126388	-2.73158	0.00977185	0.211311	-4.85262
cg24249411	-0.0246714	0.12076	-2.70211	0.0105157	0.211311	-4.92067
cg06684850	-0.0186562	0.092276	-2.5496	0.0152757	0.211311	-5.26498
cg24650785	-0.0077368	0.0540674	-2.54186	0.0155633	0.211311	-5.28208
cg15462887	-0.0126376	0.074962	-2.52462	0.0162221	0.211311	-5.32006
cg27351358	-0.00765463	0.05016	-2.49032	0.0176092	0.211311	-5.39509
cg25156688	-0.0104482	0.0640077	-2.19124	0.0351154	0.338884	-6.01766
cg25457956	-0.003302	0.0397906	-2.17621	0.036309	0.338884	-6.04737
cg02947993	0.00683673	0.0598289	2.10254	0.0426984	0.358667	-6.19076
cg16201963	0.00263316	0.0313993	1.8914	0.0667901	0.510033	-6.58001
cg01583131	-0.0178476	0.140228	-1.75389	0.0881203	0.572913	-6.81543
cg01642653	-0.00743407	0.0762818	-1.75076	0.0886651	0.572913	-6.8206
cg21291635	-0.00122568	0.0149326	-1.61589	0.115013	0.690078	-7.03658
cg22128379	0.0143201	0.12243	1.45068	0.15569	0.787124	-7.28063
cg07238832	-0.00546653	0.911066	-1.44846	0.156306	0.787124	-7.28375
cg13360150	-0.00143751	0.0224681	-1.43776	0.159299	0.787124	-7.29873
cg09606766	0.0019658	0.0271203	1.32576	0.193426	0.902654	-7.4496
cg22973087	0.00443546	0.0443024	1.22388	0.229096	0.967417	-7.57721
cg20144981	0.00214232	0.0323243	1.20054	0.237915	0.967417	-7.60512
cg25227335	0.0152684	0.175635	1.141	0.261545	0.967417	-7.67408
cg08362738	-0.00417291	0.0483046	-1.12085	0.269911	0.967417	-7.69668
cg23497217	-0.00214575	0.0408556	-1.12042	0.270093	0.967417	-7.69716
cg09025927	0.00327746	0.910121	1.07315	0.29048	0.967417	-7.74869
cg15264052	-0.00496618	0.0792656	-1.02843	0.310734	0.967417	-7.79551
cg11718030	-0.00633688	0.116831	-0.992366	0.327767	0.967417	-7.83191
cg06025631	0.00150798	0.0286058	0.977856	0.334793	0.967417	-7.84621
cg25328597	-0.0031319	0.0477521	-0.945153	0.350999	0.967417	-7.8777
cg10635145	0.0202178	0.516867	0.932013	0.357655	0.967417	-7.89007
cg06322831	-0.00562892	0.841475	-0.91066	0.368645	0.967417	-7.90981
cg12067298	0.012668	0.116013	0.904046	0.372094	0.967417	-7.91584
cg20340655	0.00198002	0.0270675	0.883673	0.382846	0.967417	-7.93414
cg11237734	0.000676613	0.0119864	0.862546	0.394204	0.967417	-7.9527
cg03747251	-0.00354882	0.0678196	-0.788707	0.435543	0.967417	-8.01416
cg15688670	0.000830196	0.0233855	0.706307	0.484629	0.967417	-8.07647
cg17882499	-0.00090976	0.0240665	-0.690478	0.494404	0.967417	-8.08768
cg16626009	-0.00295364	0.891836	-0.686762	0.496715	0.967417	-8.09027
cg12448003	0.00221591	0.0552758	0.686759	0.496717	0.967417	-8.09028
cg25381667	-0.000633968	0.0253974	-0.684429	0.498169	0.967417	-8.0919
cg04106006	0.0128364	0.348532	0.65551	0.516385	0.967417	-8.11156
cg23143371	-0.00994841	0.793418	-0.652877	0.518061	0.967417	-8.11331
cg24377657	0.00228806	0.0629072	0.640368	0.526064	0.967417	-8.12152
cg11241206	0.000791942	0.0305558	0.621386	0.538334	0.967417	-8.13369
cg24065044	-0.00240634	0.0643826	-0.598572	0.553276	0.967417	-8.14785
cg06991510	0.000818014	0.0218531	0.596045	0.554944	0.967417	-8.14938
cg07704699	-0.0194067	0.249812	-0.554969	0.582412	0.967417	-8.17345
cg00298481	0.00130595	0.0377519	0.52726	0.601308	0.967417	-8.18873
cg23619332	-0.00186752	0.0576601	-0.524384	0.603286	0.967417	-8.19027
cg25412831	0.00330531	0.110981	0.46066	0.647865	0.967417	-8.22231
cg01225698	0.00292842	0.079576	0.459322	0.648817	0.967417	-8.22294
cg12296752	0.0063713	0.85834	0.449751	0.655637	0.967417	-8.22738
cg07159484	-0.000723317	0.0368673	-0.445431	0.658726	0.967417	-8.22936
cg24027430	-0.00243572	0.895814	-0.435904	0.665558	0.967417	-8.23365
cg14589148	0.000990487	0.046471	0.411068	0.683505	0.967417	-8.2444
cg26949694	-0.00344922	0.221879	-0.407504	0.686096	0.967417	-8.2459
cg06816235	0.00218652	0.0675465	0.406711	0.686673	0.967417	-8.24623
cg04672351	0.00140784	0.0659712	0.394481	0.695597	0.967417	-8.25124
cg02613510	-0.00853121	0.171839	-0.391055	0.698105	0.967417	-8.25262
cg26057780	0.000794763	0.0329537	0.385958	0.701842	0.967417	-8.25464
cg12021170	-0.00389155	0.786385	-0.356463	0.723614	0.967417	-8.26585
cg23947039	0.00126376	0.0468261	0.336462	0.738512	0.967417	-8.27295
cg03984780	-0.00151047	0.0785046	-0.332503	0.741474	0.967417	-8.2743
cg18117895	-0.000326739	0.0177196	-0.31641	0.753553	0.967417	-8.27965
cg10022526	0.00143132	0.0475805	0.308548	0.759477	0.967417	-8.28217
cg15313332	-0.00271078	0.0614036	-0.270858	0.788076	0.967417	-8.29337
cg13629345	0.000274958	0.0191815	0.265437	0.792215	0.967417	-8.29486
cg22288103	-0.000538174	0.048077	-0.256905	0.798742	0.967417	-8.29714
cg11865360	0.00187483	0.100078	0.236142	0.814686	0.967417	-8.3024
cg22830701	0.000621682	0.0590509	0.23039	0.819118	0.967417	-8.30377
cg20954537	-0.000522626	0.0412305	-0.212424	0.832997	0.967417	-8.30785
cg26840770	0.00163397	0.0656942	0.210965	0.834127	0.967417	-8.30817
cg15914769	-0.00048261	0.038048	-0.205522	0.838344	0.967417	-8.30934
cg24924243	-0.000196255	0.0121683	-0.200012	0.842618	0.967417	-8.31048
cg05218375	0.000608004	0.0556282	0.187619	0.852249	0.967417	-8.31295
cg06046431	-0.000208101	0.0303798	-0.155995	0.876925	0.973051	-8.31853
cg09505801	-0.000523994	0.0464137	-0.151581	0.880379	0.973051	-8.31922
cg05795005	-0.000153706	0.0163647	-0.118982	0.905963	0.9779	-8.32375
cg02527472	0.000406726	0.0655986	0.106235	0.915997	0.9779	-8.32523
cg06260077	0.000828683	0.119137	0.101545	0.919692	0.9779	-8.32573
cg03167496	-0.000242232	0.0708736	-0.0438402	0.965279	0.998682	-8.33004
cg15486645	-2.23735e-05	0.0439646	-0.0081819	0.993518	0.998682	-8.33099
cg16257091	-4.08382e-05	0.153738	-0.00459068	0.996363	0.998682	-8.33102
cg01636003	-7.66527e-06	0.0503163	-0.0031563	0.997499	0.998682	-8.33102
cg15710245	4.99578e-06	0.0543	0.00166321	0.998682	0.998682	-8.33103

## Sheet: S6
Differentially methylated BDNF promoter probes Symptom Trajectory
	logFC	AveExpr	t	P.Value	adj.P.Val	B
cg10558494	-0.000783899	0.0605627	-2.80156	0.00819657	0.304746	-7.49758
cg25962210	-0.00101554	0.126388	-2.6249	0.0127207	0.304746	-7.90543
cg24249411	-0.00138946	0.12076	-2.51027	0.0167896	0.304746	-8.16048
cg22973087	0.000498695	0.0443024	2.43039	0.0202953	0.304746	-8.33351
cg02947993	0.000460726	0.0598289	2.4052	0.0215319	0.304746	-8.38725
cg24650785	-0.000441465	0.0540674	-2.40055	0.0217675	0.304746	-8.39713
cg22128379	0.00119239	0.12243	2.07472	0.0453576	0.53159	-9.05344
cg16201963	0.000167735	0.0313993	2.02358	0.0506276	0.53159	-9.14976
cg06684850	-0.000858673	0.092276	-1.88891	0.067133	0.626574	-9.39415
cg16257091	0.000847218	0.153738	1.64982	0.107842	0.816425	-9.79362
cg07238832	-0.0003338	0.911066	-1.478	0.148265	0.816425	-10.052
cg15462887	-0.000462358	0.074962	-1.46134	0.152759	0.816425	-10.0757
cg11237734	6.59247095967941e-05	0.0119864	1.42541	0.162813	0.816425	-10.1261
cg01642653	-0.000365737	0.0762818	-1.41782	0.165001	0.816425	-10.1366
cg16626009	-0.000342691	0.891836	-1.35511	0.183984	0.816425	-10.2214
cg24027430	-0.000435661	0.895814	-1.33004	0.192027	0.816425	-10.2543
cg25457956	-0.000125645	0.0397906	-1.32958	0.192177	0.816425	-10.2549
cg04672351	0.00027543	0.0659712	1.31649	0.196486	0.816425	-10.2719
cg09025927	0.000238173	0.910121	1.31175	0.198062	0.816425	-10.278
cg27351358	-0.000247558	0.05016	-1.26776	0.213172	0.816425	-10.3337
cg01583131	-0.000774537	0.140228	-1.24503	0.221313	0.816425	-10.3618
cg21291635	-5.73273e-05	0.0149326	-1.24168	0.222532	0.816425	-10.3659
cg22830701	0.000196234	0.0590509	1.23891	0.223545	0.816425	-10.3693
cg10635145	0.0014364	0.516867	1.11087	0.274124	0.959436	-10.5182
cg25412831	0.000457233	0.110981	1.07782	0.288419	0.969088	-10.5541
cg02527472	0.00022365	0.0655986	0.988277	0.329736	0.988671	-10.6465
cg23143371	-0.000846316	0.793418	-0.932848	0.357229	0.988671	-10.6998
cg12021170	-0.000598013	0.786385	-0.923685	0.361915	0.988671	-10.7084
cg05218375	0.000171331	0.0556282	0.891882	0.37849	0.988671	-10.7374
cg23947039	0.000191941	0.0468261	0.86048	0.395325	0.988671	-10.7651
cg11241206	6.34927030047072e-05	0.0305558	0.834701	0.409494	0.988671	-10.7871
cg08362738	-0.000186367	0.0483046	-0.829026	0.412655	0.988671	-10.7918
cg20144981	8.4958207982548e-05	0.0323243	0.785539	0.437373	0.988671	-10.8273
cg00298481	0.00010818	0.0377519	0.731584	0.469246	0.988671	-10.8687
cg12448003	-0.000140701	0.0552758	-0.72843	0.471151	0.988671	-10.871
cg26840770	0.000307083	0.0656942	0.665531	0.510032	0.988671	-10.9155
cg15688670	4.67671338095135e-05	0.0233855	0.663146	0.51154	0.988671	-10.9171
cg25156688	-0.000185952	0.0640077	-0.614034	0.543126	0.988671	-10.949
cg09505801	0.00012563	0.0464137	0.609578	0.546042	0.988671	-10.9518
cg06025631	5.63343608340909e-05	0.0286058	0.604553	0.549338	0.988671	-10.9549
cg11865360	0.000276719	0.100078	0.584132	0.562843	0.988671	-10.9672
cg11718030	-0.000215517	0.116831	-0.558119	0.580282	0.988671	-10.9824
cg24065044	0.000133896	0.0643826	0.555547	0.582021	0.988671	-10.9838
cg06260077	0.000258725	0.119137	0.531237	0.598578	0.988671	-10.9973
cg23497217	6.00465065569136e-05	0.0408556	0.516117	0.608988	0.988671	-11.0054
cg01225698	0.000189162	0.079576	0.495496	0.623317	0.988671	-11.016
cg05795005	3.82224434930312e-05	0.0163647	0.495208	0.623519	0.988671	-11.0162
cg24377657	0.000101366	0.0629072	0.472288	0.639625	0.988671	-11.0275
cg25381667	-2.60131e-05	0.0253974	-0.466609	0.643644	0.988671	-11.0302
cg01636003	6.69709236777748e-05	0.0503163	0.461629	0.647177	0.988671	-11.0326
cg12067298	0.000384228	0.116013	0.453825	0.65273	0.988671	-11.0362
cg23619332	9.18199686307757e-05	0.0576601	0.429792	0.669956	0.988671	-11.0471
cg25227335	0.000333815	0.175635	0.409913	0.684344	0.988671	-11.0556
cg15710245	6.99166820155497e-05	0.0543	0.38934	0.699361	0.988671	-11.064
cg26949694	0.00017535	0.221879	0.34558	0.731707	0.988671	-11.0805
cg07704699	0.000670517	0.249812	0.319148	0.751494	0.988671	-11.0895
cg13629345	1.97848322141808e-05	0.0191815	0.318669	0.751854	0.988671	-11.0897
cg10022526	8.7233574813594e-05	0.0475805	0.313901	0.755442	0.988671	-11.0912
cg22288103	3.33712852167083e-05	0.048077	0.265874	0.791881	0.988671	-11.1055
cg13360150	1.46863503811855e-05	0.0224681	0.238291	0.813032	0.988671	-11.1126
cg25328597	-3.96005e-05	0.0477521	-0.197105	0.844875	0.988671	-11.1218
cg06816235	6.35902020070817e-05	0.0675465	0.197086	0.84489	0.988671	-11.1219
cg15264052	5.60576037395592e-05	0.0792656	0.191036	0.849591	0.988671	-11.1231
cg20954537	-2.64951e-05	0.0412305	-0.179702	0.858413	0.988671	-11.1252
cg20340655	2.34119966971195e-05	0.0270675	0.172558	0.863983	0.988671	-11.1265
cg26057780	2.01814502990666e-05	0.0329537	0.163278	0.87123	0.988671	-11.1281
cg15313332	-9.36188e-05	0.0614036	-0.156037	0.876892	0.988671	-11.1293
cg02613510	0.000164435	0.171839	0.125575	0.90078	0.988671	-11.1337
cg07159484	1.17727242285008e-05	0.0368673	0.12066	0.904644	0.988671	-11.1343
cg12296752	-0.000100061	0.85834	-0.117591	0.907058	0.988671	-11.1347
cg03167496	3.50306987506206e-05	0.0708736	0.105841	0.916307	0.988671	-11.1361
cg09606766	-9.36165e-06	0.0271203	-0.102834	0.918676	0.988671	-11.1364
cg15914769	1.43974507209025e-05	0.038048	0.102282	0.919111	0.988671	-11.1364
cg03747251	-2.73828e-05	0.0678196	-0.100713	0.920348	0.988671	-11.1366
cg24924243	5.6050119527663e-06	0.0121683	0.0952133	0.924683	0.988671	-11.1372
cg14589148	-1.35836e-05	0.046471	-0.0938743	0.925739	0.988671	-11.1373
cg18117895	-5.41418e-06	0.0177196	-0.0873239	0.930907	0.988671	-11.1379
cg03984780	2.02559805050728e-05	0.0785046	0.0743179	0.941177	0.988671	-11.139
cg17882499	-5.52224e-06	0.0240665	-0.06946	0.945015	0.988671	-11.1393
cg06322831	-1.80016e-05	0.841475	-0.0480541	0.961944	0.988671	-11.1406
cg06046431	-2.89256e-06	0.0303798	-0.0361623	0.971356	0.988671	-11.1411
cg15486645	4.0851714453541e-06	0.0439646	0.0249345	0.980248	0.988671	-11.1415
cg04106006	-2.91057e-05	0.348532	-0.0246613	0.980464	0.988671	-11.1415
cg06991510	1.18222933404331e-06	0.0218531	0.0143003	0.988671	0.988671	-11.1417

## Sheet: S7
Differentially methylated BDNF promoter probes Remission
	logFC	AveExpr	t	P.Value	adj.P.Val	B
cg23947039	0.00653532	0.0468261	2.01951	0.0510686	0.960263	-6.43457
cg22973087	0.00642093	0.0443024	2.0171	0.0513315	0.960263	-6.43905
cg15313332	-0.0166937	0.0614036	-1.9285	0.061857	0.960263	-6.60087
cg24249411	-0.0162473	0.12076	-1.8695	0.0698578	0.960263	-6.70535
cg24650785	-0.00527459	0.0540674	-1.83549	0.0748601	0.960263	-6.76437
cg16257091	0.0140339	0.153738	1.81594	0.0778723	0.960263	-6.7979
cg10558494	-0.00775059	0.0605627	-1.72025	0.094135	0.960263	-6.95765
cg12021170	-0.0149442	0.786385	-1.55488	0.128885	0.960263	-7.21629
cg02947993	0.00470783	0.0598289	1.55283	0.129375	0.960263	-7.21935
cg25962210	-0.00954997	0.126388	-1.53825	0.132893	0.960263	-7.24104
cg02613510	0.0271597	0.171839	1.40531	0.168659	0.960263	-7.4305
cg05218375	0.0039329	0.0556282	1.37015	0.179283	0.960263	-7.47806
cg12067298	-0.0165356	0.116013	-1.31542	0.196841	0.960263	-7.54993
cg09025927	0.00334421	0.910121	1.21039	0.234165	0.960263	-7.68036
cg16626009	-0.00447257	0.891836	-1.15857	0.254401	0.960263	-7.74103
cg03747251	-0.00417531	0.0678196	-1.02762	0.311114	0.960263	-7.88333
cg25457956	-0.0014766	0.0397906	-1.01991	0.314703	0.960263	-7.8912
cg11237734	0.000704141	0.0119864	0.987941	0.329898	0.960263	-7.92328
cg22128379	0.00894487	0.12243	0.982263	0.332648	0.960263	-7.92887
cg07704699	-0.0304491	0.249812	-0.967006	0.340113	0.960263	-7.94375
cg21291635	-0.000681352	0.0149326	-0.963311	0.341938	0.960263	-7.94733
cg07159484	-0.00131494	0.0368673	-0.89833	0.37509	0.960263	-8.008
cg26840770	0.0061717	0.0656942	0.886352	0.38142	0.960263	-8.01875
cg14589148	-0.00192085	0.046471	-0.884848	0.38222	0.960263	-8.02009
cg09606766	-0.00120287	0.0271203	-0.88034	0.384623	0.960263	-8.02409
cg04672351	0.00282127	0.0659712	0.877649	0.386062	0.960263	-8.02647
cg01636003	0.00183608	0.0503163	0.840287	0.406397	0.960263	-8.05878
cg10635145	0.0152778	0.516867	0.772432	0.444994	0.960263	-8.11399
cg17882499	0.000873214	0.0240665	0.729268	0.470644	0.960263	-8.14678
cg13629345	-0.00067469	0.0191815	-0.720106	0.476196	0.960263	-8.15351
cg25156688	0.00323777	0.0640077	0.706295	0.484636	0.960263	-8.16349
cg25227335	-0.00846418	0.175635	-0.688427	0.495679	0.960263	-8.17612
cg24377657	-0.00215727	0.0629072	-0.664871	0.510449	0.960263	-8.19229
cg22830701	0.00160773	0.0590509	0.659258	0.514003	0.960263	-8.19606
cg23497217	0.001116	0.0408556	0.633632	0.530401	0.960263	-8.21289
cg11241206	0.000706058	0.0305558	0.608956	0.546449	0.960263	-8.22848
cg15462887	-0.00289961	0.074962	-0.589804	0.559075	0.960263	-8.24016
cg25381667	-0.000496931	0.0253974	-0.588124	0.560189	0.960263	-8.24116
cg03167496	0.00290951	0.0708736	0.582428	0.563976	0.960263	-8.24456
cg24924243	-0.000513621	0.0121683	-0.577347	0.567366	0.960263	-8.24756
cg26057780	-0.00105787	0.0329537	-0.566645	0.574537	0.960263	-8.25379
cg06046431	-0.000667253	0.0303798	-0.552151	0.58432	0.960263	-8.26205
cg06816235	0.00267873	0.0675465	0.549559	0.586079	0.960263	-8.26351
cg27351358	-0.00162804	0.05016	-0.539924	0.592636	0.960263	-8.26886
cg07238832	-0.00182171	0.911066	-0.518178	0.607563	0.960263	-8.28059
cg06025631	0.000733321	0.0286058	0.518059	0.607646	0.960263	-8.28065
cg15710245	0.00140736	0.0543	0.517646	0.607931	0.960263	-8.28087
cg25328597	0.00156811	0.0477521	0.516354	0.608824	0.960263	-8.28155
cg06991510	-0.000641977	0.0218531	-0.513726	0.610641	0.960263	-8.28293
cg12448003	-0.00147416	0.0552758	-0.501323	0.619252	0.960263	-8.28935
cg20144981	0.000819575	0.0323243	0.497022	0.622252	0.960263	-8.29155
cg23619332	0.00159946	0.0576601	0.494135	0.624268	0.960263	-8.29301
cg16201963	0.000638168	0.0313993	0.48198	0.632792	0.960263	-8.29906
cg02527472	0.0016682	0.0655986	0.481112	0.633402	0.960263	-8.29949
cg26949694	0.00367353	0.221879	0.478207	0.635448	0.960263	-8.30091
cg01642653	-0.00189012	0.0762818	-0.47151	0.640175	0.960263	-8.30416
cg06260077	0.003298	0.119137	0.44608	0.658261	0.96578	-8.31608
cg25412831	0.00275034	0.110981	0.421772	0.675746	0.96578	-8.32686
cg15264052	0.00146677	0.0792656	0.329983	0.743361	0.96578	-8.36218
cg15486645	-0.000793636	0.0439646	-0.319885	0.750939	0.96578	-8.36554
cg20954537	-0.000709895	0.0412305	-0.317793	0.752512	0.96578	-8.36623
cg15688670	-0.000322285	0.0233855	-0.299661	0.766191	0.96578	-8.37197
cg06322831	0.00169541	0.841475	0.298844	0.76681	0.96578	-8.37222
cg24027430	-0.00150654	0.895814	-0.296373	0.76868	0.96578	-8.37297
cg12296752	0.00359756	0.85834	0.279085	0.781806	0.96578	-8.37807
cg20340655	0.000573876	0.0270675	0.279085	0.781806	0.96578	-8.37807
cg13360150	0.000249375	0.0224681	0.266607	0.791321	0.96578	-8.38156
cg18117895	-0.000238017	0.0177196	-0.253103	0.801655	0.96578	-8.38516
cg05795005	0.000282244	0.0163647	0.24036	0.81144	0.96578	-8.38839
cg09505801	0.00074992	0.0464137	0.238899	0.812564	0.96578	-8.38875
cg10022526	0.000986786	0.0475805	0.234028	0.816314	0.96578	-8.38993
cg03984780	0.000793291	0.0785046	0.192029	0.848818	0.985573	-8.39911
cg01583131	-0.001681	0.140228	-0.174499	0.862469	0.985573	-8.40241
cg06684850	0.00105714	0.092276	0.146211	0.884585	0.985573	-8.40707
cg11865360	-0.000803195	0.100078	-0.111302	0.912007	0.985573	-8.41169
cg00298481	-0.000232164	0.0377519	-0.102767	0.918729	0.985573	-8.41263
cg04106006	-0.0016221	0.348532	-0.0906547	0.928279	0.985573	-8.41383
cg24065044	-0.000314037	0.0643826	-0.0855632	0.932297	0.985573	-8.41429
cg15914769	0.000162382	0.038048	0.0760594	0.939801	0.985573	-8.41508
cg11718030	0.00029875	0.116831	0.0508019	0.959769	0.985573	-8.41673
cg22288103	-9.17714e-05	0.048077	-0.0481616	0.961859	0.985573	-8.41686
cg01225698	0.000209621	0.079576	0.0360879	0.971415	0.985573	-8.41738
cg08362738	6.7370098724513e-05	0.0483046	0.0195739	0.984493	0.985573	-8.41786
cg23143371	-0.000253581	0.793418	-0.0182112	0.985573	0.985573	-8.41788

## Sheet: S8
Probe-level estimates of methylation concordance between peripheral blood and multiple brain regions providing correlations for 90 probes in the BECon database
	CpG ID	Genomic Coordinate (hg19)	Chr (hg19)	Associated Genes	CpG in Feature of Gene, respectively	Cor Blood-BA7	Cor Blood- BA10	Cor Blood- BA20	Mean Cor All Brain	SD Mean Cor All Brain	Percentile of Mean Cor All Brain (positive)	Percentile of Mean Cor All Brain (negative)	Mean Change Beta with Blood Cell Composition Normalization	Mean Change Beta with Brain Cell Composition Normalization	Percentile rank of CpG Change Beta with Blood Cell Comp	Percentile rank of CpG Change Beta with Brain Cell Comp	Var in Blood	Var in All Brain	Var in BA7	Var in BA10	Var in BA20
1	cg03539765	9217390	12	A2M-AS1, LINC00612	promoter, promoter	-0.579412	0.0264706	-0.191176	-0.248039	0.306918	-	75-90%	0.06	0	90% (Blood Cell Comp.)	<50% (Brain Cell Comp.)	0.207999	0.0303525	0.0223067	0.0316377	0.0264861
2	cg23795048	9217529	12	A2M-AS1, LINC00612	promoter, promoter	0.285294	0.188235	-0.0470588	0.142157	0.170901	50-75%	-	0.04	0	90% (Blood Cell Comp.)	<50% (Brain Cell Comp.)	0.192702	0.0871456	0.0971854	0.0845375	0.0741957
3	cg13575925	9217583	12	A2M-AS1, LINC00612	promoter, promoter	0.0764706	0.0352941	-0.105882	0.00196078	0.0956372	<50%	-	0.05	0.01	90% (Blood Cell Comp.)	50-75% (Brain Cell Comp.)	0.195181	0.0899418	0.100377	0.0880144	0.0657407
4	cg26114124	9217669	12	A2M-AS1, LINC00612	promoter, promoter	0.547059	0.502941	0.0647059	0.371569	0.266665	0.9	-	0.06	0	90% (Blood Cell Comp.)	50-75% (Brain Cell Comp.)	0.238277	0.168592	0.165503	0.183588	0.132593
5	cg20380214	9217688	12	A2M-AS1, LINC00612	promoter, promoter	0.276471	0.5	-0.0411765	0.245098	0.271949	75-90%	-	0.06	0.01	90% (Blood Cell Comp.)	50-75% (Brain Cell Comp.)	0.260971	0.15367	0.155728	0.15599	0.125764
6	cg10605084	9217763	12	A2M-AS1, LINC00612	promoter, promoter	0.414706	0.191176	-0.129412	0.158824	0.273498	50-75%	-	0.04	0	75-90% (Blood Cell Comp.)	50-75% (Brain Cell Comp.)	0.148672	0.0801159	0.0926623	0.0718014	0.0668458
7	cg02883147	9217769	12	A2M-AS1, LINC00612	promoter, promoter	0.358824	0.482353	0.0470588	0.296078	0.224328	75-90%	-	0.05	0.01	90% (Blood Cell Comp.)	50-75% (Brain Cell Comp.)	0.229569	0.153515	0.128847	0.164636	0.123562
8	cg21442626	104032819	8	ATP6V1C1	promoter	0.517647	0.261765	0.170588	0.316667	0.179925	75-90%	-	0.05	0.04	90% (Blood Cell Comp.)	90% (Brain Cell Comp.)	0.218022	0.175391	0.129562	0.192142	0.165731
9	cg22150661	104032860	8	ATP6V1C1	promoter	0.579412	0.470588	0.1	0.383333	0.251334	0.9	-	0.03	0.03	75-90% (Blood Cell Comp.)	75-90% (Brain Cell Comp.)	0.220126	0.134016	0.1096	0.145184	0.120509
10	cg14877637	104032876	8	ATP6V1C1	promoter	0.567647	0.270588	0.232353	0.356863	0.183543	75-90%	-	0.03	0.03	75-90% (Blood Cell Comp.)	75-90% (Brain Cell Comp.)	0.147903	0.12852	0.0912491	0.148841	0.130479
11	cg17188169	74104388	6	DDX43	promoter	0.185294	0.0382353	-0.0441176	0.0598039	0.116217	<50%	-	0.05	0.01	90% (Blood Cell Comp.)	50-75% (Brain Cell Comp.)	0.261414	0.195546	0.179799	0.181384	0.193956
12	cg12045875	74104594	6	DDX43	intragenic	0.647059	0.505882	0.438235	0.530392	0.106547	0.9	-	0.06	0.01	90% (Blood Cell Comp.)	50-75% (Brain Cell Comp.)	0.244186	0.180242	0.151955	0.179742	0.167193
13	cg16143502	74104801	6	DDX43	intragenic	0.482353	0.173529	0.411765	0.355882	0.161818	75-90%	-	0.04	0.01	90% (Blood Cell Comp.)	50-75% (Brain Cell Comp.)	0.207685	0.126712	0.116302	0.139129	0.115328
14	cg08124399	74104868	6	DDX43	intragenic	0.620588	0.305882	0.235294	0.387255	0.205132	0.9	-	0.07	0.01	90% (Blood Cell Comp.)	50-75% (Brain Cell Comp.)	0.284056	0.206835	0.198341	0.206773	0.198337
15	cg25210835	110254828	1	GSTM5	promoter	0.182353	0.0970588	-0.0794118	0.0666667	0.133503	<50%	-	0.05	0.03	90% (Blood Cell Comp.)	75-90% (Brain Cell Comp.)	0.264941	0.237302	0.223599	0.274917	0.209051
16	cg24467349	110254835	1	GSTM5	promoter	0.108824	0.191176	-0.114706	0.0617647	0.158278	<50%	-	0.06	0.03	90% (Blood Cell Comp.)	75-90% (Brain Cell Comp.)	0.316932	0.258322	0.251047	0.288989	0.225785
17	cg12858902	110254854	1	GSTM5	promoter	0.176471	0.164706	-0.173529	0.0558824	0.198763	<50%	-	0.05	0.02	90% (Blood Cell Comp.)	75-90% (Brain Cell Comp.)	0.226602	0.176662	0.18442	0.171256	0.165746
18	cg23936031	27183133	7	HOXA-AS3, HOXA5	intragenic, promoter	0.267647	-0.152941	-0.102941	0.00392157	0.229757	<50%	-	0.02	0.01	50-75% (Blood Cell Comp.)	75-90% (Brain Cell Comp.)	0.275497	0.122993	0.0922127	0.109707	0.125793
19	cg04863892	27183375	7	HOXA-AS3, HOXA5	intragenic, promoter	-0.117647	-0.0441176	-0.232353	-0.131373	0.0948653	-	<50%	0.04	0.01	75-90% (Blood Cell Comp.)	50-75% (Brain Cell Comp.)	0.390106	0.103989	0.0770471	0.10263	0.116225
20	cg19759481	27183401	7	HOXA-AS3, HOXA5	intragenic, promoter	-0.258824	-0.3	-0.205882	-0.254902	0.0471812	-	75-90%	0.04	0.01	75-90% (Blood Cell Comp.)	50-75% (Brain Cell Comp.)	0.377484	0.0721085	0.0385846	0.0661696	0.0884494
21	cg02916332	27183591	7	HOXA-AS3, HOXA5	intragenic, promoter	-0.0823529	-0.0882353	-0.132353	-0.10098	0.0273282	-	<50%	0.02	0.01	75-90% (Blood Cell Comp.)	50-75% (Brain Cell Comp.)	0.265173	0.0689712	0.0529132	0.0844686	0.0786192
22	cg17569124	27183643	7	HOXA-AS3, HOXA5	intragenic, promoter	-0.176471	0.335294	-0.155882	0.000980392	0.289707	<50%	-	0.03	0.01	75-90% (Blood Cell Comp.)	50-75% (Brain Cell Comp.)	0.329709	0.068287	0.0535963	0.0574463	0.0786986
23	cg02005600	27183686	7	HOXA-AS3, HOXA5	intragenic, promoter	-0.141176	-0.141176	-0.261765	-0.181373	0.0696217	-	50-75%	0.04	0.01	75-90% (Blood Cell Comp.)	50-75% (Brain Cell Comp.)	0.316297	0.0944147	0.0631795	0.0952713	0.105573
24	cg25307665	27183694	7	HOXA-AS3, HOXA5	intragenic, promoter	0.0470588	0.0735294	-0.264706	-0.0480392	0.188105	-	<50%	0.04	0.01	75-90% (Blood Cell Comp.)	50-75% (Brain Cell Comp.)	0.322765	0.077569	0.0668531	0.0690616	0.0909041
25	cg14014955	27183701	7	HOXA-AS3, HOXA5	intragenic, promoter	-0.132353	-0.0558824	-0.573529	-0.253922	0.279417	-	75-90%	0.03	0.01	75-90% (Blood Cell Comp.)	75-90% (Brain Cell Comp.)	0.260367	0.0970984	0.0651753	0.107518	0.086593
26	cg02646423	27183794	7	HOXA-AS3, HOXA5	intragenic, promoter	0.00588235	-0.217647	-0.314706	-0.17549	0.164399	-	50-75%	0.03	0.01	75-90% (Blood Cell Comp.)	50-75% (Brain Cell Comp.)	0.226815	0.0904643	0.048573	0.0959437	0.0950791
27	cg20517050	27183806	7	HOXA-AS3, HOXA5	intragenic, promoter	0.482353	0.208824	-0.291176	0.133333	0.392251	50-75%	-	0.03	0	75-90% (Blood Cell Comp.)	<50% (Brain Cell Comp.)	0.260822	0.110794	0.102488	0.112493	0.0956355
28	cg25506432	27184065	7	HOXA-AS3, HOXA5	intragenic, promoter	-0.126471	0.335294	-0.45	-0.0803922	0.39467	-	<50%	0.02	0	75-90% (Blood Cell Comp.)	50-75% (Brain Cell Comp.)	0.209758	0.083351	0.0652493	0.0707236	0.0948127
29	cg20817131	27184167	7	HOXA-AS3, HOXA5	intragenic, promoter	0.285294	0.167647	-0.138235	0.104902	0.218625	<50%	-	0.02	0.01	75-90% (Blood Cell Comp.)	75-90% (Brain Cell Comp.)	0.282266	0.1069	0.0906225	0.147718	0.101863
30	cg01323381	27184264	7	HOXA-AS3, HOXA5	intragenic, promoter	0.452941	0.117647	-0.202941	0.122549	0.327969	<50%	-	0.02	0.01	50-75% (Blood Cell Comp.)	50-75% (Brain Cell Comp.)	0.239465	0.0789251	0.0701534	0.0857845	0.0825264
31	cg26023912	27184369	7	HOXA-AS3, HOXA5	intragenic, promoter	0.117647	0.0264706	0.0941176	0.0794118	0.0473338	<50%	-	0.03	0.01	75-90% (Blood Cell Comp.)	50-75% (Brain Cell Comp.)	0.256274	0.0618726	0.0401559	0.0734888	0.0483641
32	cg14882265	27184375	7	HOXA-AS3, HOXA5	intragenic, promoter	-0.105882	0.241176	-0.308824	-0.0578431	0.278129	-	<50%	0.02	0.01	75-90% (Blood Cell Comp.)	50-75% (Brain Cell Comp.)	0.264617	0.0800257	0.0553309	0.114182	0.0606114
33	cg17432857	27184438	7	HOXA-AS3, HOXA5	intragenic, promoter	0.152941	-0.0205882	0.0529412	0.0617647	0.0871005	<50%	-	0.03	0.01	75-90% (Blood Cell Comp.)	50-75% (Brain Cell Comp.)	0.263789	0.0789011	0.0598579	0.121084	0.0749978
34	cg00969405	27184441	7	HOXA-AS3, HOXA5	intragenic, promoter	0.223529	-0.170588	-0.155882	-0.0343137	0.22342	-	<50%	0.03	0.01	75-90% (Blood Cell Comp.)	50-75% (Brain Cell Comp.)	0.254049	0.110569	0.0718479	0.100567	0.114068
35	cg03368099	27184521	7	HOXA-AS3, HOXA5	intragenic, promoter	-0.173529	0.188235	-0.0882353	-0.0245098	0.189114	-	<50%	0.03	0.01	75-90% (Blood Cell Comp.)	50-75% (Brain Cell Comp.)	0.246109	0.0803306	0.0566314	0.0870176	0.0895251
36	cg23884241	27169957	7	HOXA4	intragenic	0.158824	0.138235	-0.214706	0.027451	0.209966	<50%	-	0.04	0.03	90% (Blood Cell Comp.)	75-90% (Brain Cell Comp.)	0.153651	0.233204	0.194272	0.224393	0.236279
37	cg22997113	27170241	7	HOXA4	promoter	0.188235	0.347059	0.0647059	0.2	0.141544	50-75%	-	0.05	0.01	90% (Blood Cell Comp.)	75-90% (Brain Cell Comp.)	0.20784	0.127994	0.0834659	0.150215	0.126267
38	cg04317399	27170313	7	HOXA4	promoter	-0.00588235	0.0441176	0.00882353	0.0156863	0.0256967	<50%	-	0.05	0.01	90% (Blood Cell Comp.)	50-75% (Brain Cell Comp.)	0.204919	0.0713854	0.0649403	0.0666369	0.081975
39	cg07317062	27170388	7	HOXA4	promoter	-0.211765	0	0.117647	-0.0313725	0.166932	-	<50%	0.07	0.01	90% (Blood Cell Comp.)	50-75% (Brain Cell Comp.)	0.259508	0.0804729	0.0635935	0.0830169	0.0753007
40	cg19142026	27170394	7	HOXA4	promoter	0.314706	0.35	0.276471	0.313725	0.0367745	75-90%	-	0.08	0	90% (Blood Cell Comp.)	50-75% (Brain Cell Comp.)	0.301215	0.0481845	0.0381903	0.050485	0.049628
41	cg11410718	27170412	7	HOXA4	promoter	0.167647	0.441176	0.391176	0.333333	0.14565	75-90%	-	0.06	0.01	90% (Blood Cell Comp.)	50-75% (Brain Cell Comp.)	0.197711	0.080223	0.0715881	0.0734026	0.0739465
42	cg16651126	27170552	7	HOXA4	promoter	0.00294118	0.247059	0.0294118	0.0931373	0.133955	<50%	-	0.05	0.01	90% (Blood Cell Comp.)	50-75% (Brain Cell Comp.)	0.181687	0.0977889	0.105505	0.091991	0.112581
43	cg11015251	27170554	7	HOXA4	promoter	0.108824	0.273529	-0.167647	0.0715686	0.222935	<50%	-	0.05	0.01	90% (Blood Cell Comp.)	75-90% (Brain Cell Comp.)	0.183703	0.133827	0.13826	0.13077	0.135801
44	cg17457637	27170717	7	HOXA4	promoter	0.241176	0.0617647	0.158824	0.153922	0.0898063	50-75%	-	0.05	0.01	90% (Blood Cell Comp.)	50-75% (Brain Cell Comp.)	0.179328	0.0674179	0.0628645	0.0672364	0.0791006
45	cg03724423	27170755	7	HOXA4	promoter	0.3	0.0852941	0.288235	0.22451	0.120708	50-75%	-	0.05	0.01	90% (Blood Cell Comp.)	50-75% (Brain Cell Comp.)	0.208141	0.0750395	0.0616852	0.0792966	0.072687
46	cg08657492	27170832	7	HOXA4	promoter	0.117647	0.385294	0.288235	0.263725	0.135496	75-90%	-	0.05	0.01	90% (Blood Cell Comp.)	50-75% (Brain Cell Comp.)	0.22128	0.102981	0.0633889	0.110271	0.095615
47	cg14359292	27170892	7	HOXA4	promoter	0.320588	0.532353	0.288235	0.380392	0.132592	0.9	-	0.06	0.01	90% (Blood Cell Comp.)	50-75% (Brain Cell Comp.)	0.236509	0.0521048	0.0456791	0.0523773	0.0487644
48	cg25952581	27170961	7	HOXA4	promoter	-0.170588	0.241176	0.0823529	0.0509804	0.207667	<50%	-	0.05	0.01	90% (Blood Cell Comp.)	50-75% (Brain Cell Comp.)	0.225117	0.0652952	0.0546051	0.0715591	0.0634331
49	cg24169822	27170994	7	HOXA4	promoter	0.1	0.0352941	0.214706	0.116667	0.0908597	<50%	-	0.07	0.01	90% (Blood Cell Comp.)	50-75% (Brain Cell Comp.)	0.299679	0.0726408	0.0710982	0.0760967	0.0617552
50	cg07093428	18433500	11	LDHC	promoter	0.626471	0.55	0.679412	0.618627	0.0650614	0.9	-	0.03	0.01	75-90% (Blood Cell Comp.)	50-75% (Brain Cell Comp.)	0.180154	0.182092	0.161344	0.160519	0.188609
51	cg19767548	18433554	11	LDHC	promoter	0.614706	0.652941	0.773529	0.680392	0.0828939	0.9	-	0.02	0.02	75-90% (Blood Cell Comp.)	75-90% (Brain Cell Comp.)	0.18354	0.221195	0.214697	0.220815	0.224332
52	cg14332815	18433564	11	LDHC	promoter	0.755882	0.811765	0.811765	0.793137	0.0322637	0.9	-	0.02	0.02	75-90% (Blood Cell Comp.)	75-90% (Brain Cell Comp.)	0.206475	0.22878	0.197429	0.214598	0.215201
53	cg11821245	18433683	11	LDHC	promoter	0.605882	0.555882	0.705882	0.622549	0.0763763	0.9	-	0.02	0.01	75-90% (Blood Cell Comp.)	50-75% (Brain Cell Comp.)	0.236145	0.199215	0.167934	0.199778	0.191088
54	cg27539023	75005076	23	MAGEE2	promoter	0.338235	0.382353	0.417647	0.379412	0.0397875	0.9	-	0.03	0.02	75-90% (Blood Cell Comp.)	75-90% (Brain Cell Comp.)	0.250387	0.175512	0.16485	0.156428	0.169038
55	cg05152459	75005087	23	MAGEE2	promoter	0.502941	0.585294	0.494118	0.527451	0.0502875	0.9	-	0.04	0.01	90% (Blood Cell Comp.)	75-90% (Brain Cell Comp.)	0.277921	0.24226	0.242402	0.229061	0.201092
56	cg11703777	75005096	23	MAGEE2	promoter	0.376471	0.297059	0.588235	0.420588	0.150518	0.9	-	0.04	0.01	90% (Blood Cell Comp.)	50-75% (Brain Cell Comp.)	0.28083	0.173032	0.178838	0.153438	0.15717
57	cg21226059	178986404	5	RUFY1, RUFY1	intragenic, promoter	0.352941	0.282353	-0.194118	0.147059	0.297568	50-75%	-	0.04	0	90% (Blood Cell Comp.)	<50% (Brain Cell Comp.)	0.201407	0.0175177	0.0155315	0.0149134	0.0239642
58	cg02136620	178986620	5	RUFY1, RUFY1	intragenic, promoter	-0.229412	-0.320588	0.0647059	-0.161765	0.201358	-	50-75%	0.04	0	90% (Blood Cell Comp.)	50-75% (Brain Cell Comp.)	0.223475	0.051004	0.0504137	0.0508512	0.0519338
59	cg09060608	178986726	5	RUFY1, RUFY1	intragenic, promoter	0.0882353	-0.352941	-0.238235	-0.167647	0.228902	-	50-75%	0.04	0	90% (Blood Cell Comp.)	<50% (Brain Cell Comp.)	0.194818	0.0294763	0.0232029	0.0260965	0.0277014
60	cg05457628	178986728	5	RUFY1, RUFY1	intragenic, promoter	-0.120588	0.0441176	0.173529	0.0323529	0.147411	<50%	-	0.03	0	75-90% (Blood Cell Comp.)	<50% (Brain Cell Comp.)	0.171828	0.0316227	0.0302612	0.0330597	0.022814
61	cg22764044	178986830	5	RUFY1, RUFY1	intragenic, promoter	-0.0735294	0.00882353	-0.220588	-0.095098	0.116217	-	<50%	0.03	0	75-90% (Blood Cell Comp.)	<50% (Brain Cell Comp.)	0.163652	0.0271005	0.025332	0.0265694	0.02509
62	cg26516362	178986906	5	RUFY1, RUFY1	intragenic, promoter	0.276471	0.0323529	-0.217647	0.0303922	0.247065	<50%	-	0.04	0	75-90% (Blood Cell Comp.)	<50% (Brain Cell Comp.)	0.175662	0.039582	0.0379857	0.032613	0.0395221
63	cg12477880	36259241	21	RUNX1	intragenic	-0.0176471	0.191176	0.158824	0.110784	0.112395	<50%	-	0.1	0	90% (Blood Cell Comp.)	<50% (Brain Cell Comp.)	0.416047	0.0280644	0.026439	0.0287561	0.0254564
64	cg00994804	36259383	21	RUNX1	intragenic	0.370588	0.7	0.408824	0.493137	0.180166	0.9	-	0.1	0	90% (Blood Cell Comp.)	<50% (Brain Cell Comp.)	0.406258	0.0239166	0.0232033	0.0188923	0.0340825
65	cg06758350	36259460	21	RUNX1	intragenic	0.217647	0.364706	0.0264706	0.202941	0.169597	50-75%	-	0.08	0	90% (Blood Cell Comp.)	<50% (Brain Cell Comp.)	0.314518	0.0317872	0.0265462	0.0293129	0.0334221
66	cg02573566	153599479	1	S100A13, S100A1, S100A13	intragenic, promoter, promoter	-0.158824	-0.167647	-0.438235	-0.254902	0.158833	-	75-90%	0.04	0.01	90% (Blood Cell Comp.)	50-75% (Brain Cell Comp.)	0.177155	0.0950512	0.104526	0.058026	0.0826507
67	cg13946767	153599671	1	S100A13, S100A1, S100A13	intragenic, promoter, promoter	0.2	0.0794118	-0.241176	0.0127451	0.228019	<50%	-	0.05	0.01	90% (Blood Cell Comp.)	50-75% (Brain Cell Comp.)	0.236354	0.0911885	0.0587219	0.0630767	0.0832392
68	cg11343894	153599704	1	S100A13, S100A1, S100A13	intragenic, promoter, promoter	-0.05	0.135294	-0.229412	-0.0480392	0.182361	-	<50%	0.06	0.01	90% (Blood Cell Comp.)	75-90% (Brain Cell Comp.)	0.270396	0.085695	0.0475749	0.112396	0.0793157
69	cg02331910	153599831	1	S100A13, S100A1, S100A13	intragenic, promoter, promoter	-0.0382353	0.220588	-0.202941	-0.00686275	0.213501	-	<50%	0.04	0.01	75-90% (Blood Cell Comp.)	50-75% (Brain Cell Comp.)	0.199625	0.0768239	0.0550385	0.0865424	0.0651361
70	cg17248924	110062384	5	TMEM232	promoter	0.167647	0.294118	-0.238235	0.0745098	0.278129	<50%	-	0.07	0.01	90% (Blood Cell Comp.)	50-75% (Brain Cell Comp.)	0.40505	0.164192	0.202371	0.143069	0.148933
71	cg11641395	110062398	5	TMEM232	promoter	0.326471	0.352941	-0.0529412	0.208824	0.227081	50-75%	-	0.06	0.01	90% (Blood Cell Comp.)	50-75% (Brain Cell Comp.)	0.35255	0.138661	0.16898	0.105083	0.12844
72	cg06429214	110062417	5	TMEM232	promoter	0.0441176	0.370588	-0.367647	0.0156863	0.369938	<50%	-	0.06	0.01	90% (Blood Cell Comp.)	50-75% (Brain Cell Comp.)	0.32524	0.159811	0.14435	0.12619	0.163191
73	cg25259944	110062473	5	TMEM232	promoter	0.188235	0.144118	-0.335294	-0.000980392	0.290363	-	<50%	0.06	0.01	90% (Blood Cell Comp.)	50-75% (Brain Cell Comp.)	0.352078	0.151713	0.150515	0.146354	0.138109
74	cg19526166	110062729	5	TMEM232	promoter	0.238235	0.1	-0.194118	0.0480392	0.22081	<50%	-	0.07	0.01	90% (Blood Cell Comp.)	50-75% (Brain Cell Comp.)	0.344403	0.176527	0.231723	0.149817	0.150485
75	cg06414816	110062837	5	TMEM232	promoter	0.232353	0.15	-0.117647	0.0882353	0.182992	<50%	-	0.05	0.01	90% (Blood Cell Comp.)	75-90% (Brain Cell Comp.)	0.27488	0.157909	0.16608	0.113902	0.186205
76	cg04218760	45406644	10	TMEM72-AS1, TMEM72	intragenic, promoter	-0.138235	0.1	0.00294118	-0.0117647	0.119797	-	<50%	0.05	0.01	90% (Blood Cell Comp.)	75-90% (Brain Cell Comp.)	0.23764	0.0802341	0.0756172	0.0575751	0.0814033
77	cg13319266	45406681	10	TMEM72-AS1, TMEM72	intragenic, promoter	-0.152941	-0.0911765	-0.232353	-0.158824	0.0707718	-	50-75%	0.03	0.02	75-90% (Blood Cell Comp.)	75-90% (Brain Cell Comp.)	0.155562	0.0989016	0.0730276	0.103967	0.0885856
78	cg05187965	45406764	10	TMEM72-AS1, TMEM72	intragenic, promoter	0.0705882	0.188235	0.0294118	0.0960784	0.0824229	<50%	-	0.04	0.01	90% (Blood Cell Comp.)	75-90% (Brain Cell Comp.)	0.272994	0.13494	0.106304	0.0872173	0.129906
79	cg06994016	45406847	10	TMEM72-AS1, TMEM72	intragenic, promoter	-0.0323529	-0.0617647	-0.0764706	-0.0568627	0.0224636	-	<50%	0.03	0.01	75-90% (Blood Cell Comp.)	50-75% (Brain Cell Comp.)	0.226327	0.0639774	0.0705462	0.0553583	0.0673756
80	cg18649823	55660591	19	TNNT1	promoter	-0.311765	0.0117647	-0.0176471	-0.105882	0.178905	-	<50%	0.06	0.03	90% (Blood Cell Comp.)	90% (Brain Cell Comp.)	0.186079	0.111032	0.096387	0.118858	0.0878076
81	cg24699670	55660614	19	TNNT1	promoter	-0.0382353	0.197059	0.120588	0.0931373	0.120025	<50%	-	0.07	0.03	90% (Blood Cell Comp.)	90% (Brain Cell Comp.)	0.210152	0.120744	0.106586	0.142046	0.0767963
82	cg19504245	55660620	19	TNNT1	promoter	-0.35	0.573529	0.297059	0.173529	0.473995	50-75%	-	0.09	0.04	90% (Blood Cell Comp.)	90% (Brain Cell Comp.)	0.267007	0.143564	0.107326	0.161483	0.0995049
83	cg10218876	55660625	19	TNNT1	promoter	0.185294	0.0323529	0.352941	0.190196	0.16035	50-75%	-	0.08	0.03	90% (Blood Cell Comp.)	90% (Brain Cell Comp.)	0.216139	0.133127	0.0893742	0.146245	0.0900253
84	cg08745965	135416529	5	VTRNA2-1	promoter	0.717647	0.617647	0.611765	0.64902	0.0595058	0.9	-	0.1	0.02	90% (Blood Cell Comp.)	75-90% (Brain Cell Comp.)	0.414422	0.367018	0.358287	0.340556	0.364026
85	cg18797653	135416613	5	VTRNA2-1	promoter	0.758824	0.523529	0.555882	0.612745	0.127538	0.9	-	0.11	0.02	90% (Blood Cell Comp.)	75-90% (Brain Cell Comp.)	0.486385	0.39182	0.387203	0.376033	0.389111
86	cg18678645	135416331	5	VTRNA2-1, VTRNA2-1	three_plus, promoter	0.817647	0.597059	0.667647	0.694118	0.112651	0.9	-	0.11	0.03	90% (Blood Cell Comp.)	75-90% (Brain Cell Comp.)	0.493037	0.445048	0.422404	0.438411	0.434504
87	cg06536614	135416381	5	VTRNA2-1, VTRNA2-1	three_plus, promoter	0.752941	0.591176	0.717647	0.687255	0.0850571	0.9	-	0.09	0.02	90% (Blood Cell Comp.)	75-90% (Brain Cell Comp.)	0.476125	0.383732	0.379682	0.355031	0.391525
88	cg25340688	135416398	5	VTRNA2-1, VTRNA2-1	three_plus, promoter	0.741176	0.573529	0.661765	0.658824	0.0838622	0.9	-	0.11	0.02	90% (Blood Cell Comp.)	75-90% (Brain Cell Comp.)	0.506378	0.427232	0.42404	0.429272	0.428271
89	cg26896946	135416405	5	VTRNA2-1, VTRNA2-1	three_plus, promoter	0.673529	0.564706	0.723529	0.653922	0.081207	0.9	-	0.09	0.02	90% (Blood Cell Comp.)	75-90% (Brain Cell Comp.)	0.397417	0.304333	0.297508	0.285783	0.303127
90	cg00124993	135416412	5	VTRNA2-1, VTRNA2-1	three_plus, promoter	0.832353	0.623529	0.705882	0.720588	0.105186	0.9	-	0.11	0.02	90% (Blood Cell Comp.)	75-90% (Brain Cell Comp.)	0.482986	0.40166	0.395202	0.383871	0.394607

## Sheet: S9
Probe-level estimates of BDNF methylation concordance between peripheral blood and multiple brain regions providing correlations for 9 probes in the BECon database - Treatment Response
	CpG ID	Genomic Coordinate (hg19)	Chr (hg19)	Associated Genes	CpG in Feature of Gene, respectively	Cor Blood-BA7	Cor Blood- BA10	Cor Blood- BA20	Mean Cor All Brain	SD Mean Cor All Brain	Percentile of Mean Cor All Brain (positive)	Percentile of Mean Cor All Brain (negative)	Mean Change Beta with Blood Cell Composition Normalization	Mean Change Beta with Brain Cell Composition Normalization	Percentile rank of CpG Change Beta with Blood Cell Comp	Percentile rank of CpG Change Beta with Brain Cell Comp	Var in Blood	Var in All Brain	Var in BA7	Var in BA10	Var in BA20
1	cg25457956	27743664	11	BDNF	promoter	0.111765	-0.0676471	0.35	0.131373	0.209513	50-75%	-	0.01	0	<50% (Blood Cell Comp.)	<50% (Brain Cell Comp.)	0.0172286	0.011542	0.008441	0.0108772	0.0121916
2	cg15462887	27744049	11	BDNF	promoter	0.194118	-0.0294118	0.232353	0.132353	0.141391	50-75%	-	0.01	0	50-75% (Blood Cell Comp.)	<50% (Brain Cell Comp.)	0.0566885	0.0582215	0.0680175	0.0518351	0.0375697
3	cg24249411	27744759	11	BDNF	promoter	0.0911765	0.123529	0.152941	0.122549	0.030894	<50%	-	0.01	0.02	50-75% (Blood Cell Comp.)	75-90% (Brain Cell Comp.)	0.0747666	0.0846367	0.0687004	0.115492	0.0615516
4	cg02947993	27528506	11	BDNF-AS, LIN7C	promoter, promoter	-0.1	-0.517647	-0.135294	-0.25098	0.231613	-	75-90%	0	0	<50% (Blood Cell Comp.)	<50% (Brain Cell Comp.)	0.0199688	0.0137952	0.0140062	0.0098593	0.0138043
5	cg25962210	27721222	11	BDNF, BDNF	intragenic, promoter	0.0117647	-0.147059	0.267647	0.0441177	0.209237	<50%	-	0.02	0	50-75% (Blood Cell Comp.)	<50% (Brain Cell Comp.)	0.0477941	0.014659	0.013751	0.0144245	0.0149161
6	cg10558494	27721280	11	BDNF, BDNF	intragenic, promoter	-0.0588235	-0.138235	-0.0705882	-0.0892157	0.0428578	-	<50%	0.01	0	<50% (Blood Cell Comp.)	<50% (Brain Cell Comp.)	0.0318947	0.0153497	0.012386	0.0168917	0.0163695
7	cg24650785	27741916	11	BDNF, BDNF	intragenic, promoter	0.0676471	0.0441177	-0.167647	-0.0186275	0.12959	-	<50%	0.01	0	<50% (Blood Cell Comp.)	<50% (Brain Cell Comp.)	0.0402664	0.02673	0.0307315	0.0219206	0.0139907
8	cg06684850	27742369	11	BDNF, BDNF	intragenic, promoter	-0.279412	-0.502941	-0.176471	-0.319608	0.166906	-	0.9	0.03	0	75-90% (Blood Cell Comp.)	50-75% (Brain Cell Comp.)	0.13724	0.0552215	0.0467535	0.051845	0.0626683
9	cg27351358	27743258	11	BDNF, BDNF	intragenic, promoter	-0.294118	-0.188235	-0.223529	-0.235294	0.0539127	-	75-90%	0.02	0	50-75% (Blood Cell Comp.)	<50% (Brain Cell Comp.)	0.0500963	0.0262963	0.0153167	0.0324674	0.0205027
Probe-level estimates of BDNF methylation concordance between peripheral blood and multiple brain regions providing correlations for 6 probes in the BECon database - Symtom Trajectory
	CpG ID	Genomic Coordinate (hg19)	Chr (hg19)	Associated Genes	CpG in Feature of Gene, respectively	Cor Blood-BA7	Cor Blood- BA10	Cor Blood- BA20	Mean Cor All Brain	SD Mean Cor All Brain	Percentile of Mean Cor All Brain (positive)	Percentile of Mean Cor All Brain (negative)	Mean Change Beta with Blood Cell Composition Normalization	Mean Change Beta with Brain Cell Composition Normalization	Percentile rank of CpG Change Beta with Blood Cell Comp	Percentile rank of CpG Change Beta with Brain Cell Comp	Var in Blood	Var in All Brain	Var in BA7	Var in BA10	Var in BA20
1	cg24249411	27744759	11	BDNF	promoter	0.0911765	0.123529	0.152941	0.122549	0.030894	<50%	-	0.01	0.02	50-75% (Blood Cell Comp.)	75-90% (Brain Cell Comp.)	0.0747666	0.0846368	0.0687004	0.115492	0.0615516
2	cg02947993	27528506	11	BDNF-AS, LIN7C	promoter, promoter	-0.1	-0.517647	-0.135294	-0.25098	0.231613	-	75-90%	0	0	<50% (Blood Cell Comp.)	<50% (Brain Cell Comp.)	0.0199688	0.0137952	0.0140063	0.0098593	0.0138043
3	cg22973087	27528587	11	BDNF-AS, LIN7C	promoter, promoter	-0.0705882	-0.223529	-0.417647	-0.237255	0.173936	-	75-90%	0	0	<50% (Blood Cell Comp.)	<50% (Brain Cell Comp.)	0.0146574	0.0154679	0.0157089	0.0101742	0.018729
4	cg25962210	27721222	11	BDNF, BDNF	intragenic, promoter	0.0117647	-0.147059	0.267647	0.0441176	0.209237	<50%	-	0.02	0	50-75% (Blood Cell Comp.)	<50% (Brain Cell Comp.)	0.0477941	0.014659	0.013751	0.0144244	0.0149161
5	cg10558494	27721280	11	BDNF, BDNF	intragenic, promoter	-0.0588235	-0.138235	-0.0705882	-0.0892157	0.0428578	-	<50%	0.01	0	<50% (Blood Cell Comp.)	<50% (Brain Cell Comp.)	0.0318947	0.0153497	0.012386	0.0168917	0.0163695
6	cg24650785	27741916	11	BDNF, BDNF	intragenic, promoter	0.0676471	0.0441176	-0.167647	-0.0186275	0.12959	-	<50%	0.01	0	<50% (Blood Cell Comp.)	<50% (Brain Cell Comp.)	0.0402664	0.02673	0.0307315	0.0219206	0.0139907

[truncated: 6 more sheets: S10, S11, S12, S13, S14, S15]
